# Supplementary material for: Laccase-catalyzed synthesis of catechol thioethers by reaction of catechols with thiols using air as an oxidant
Source: Royal Society of Chemistry journal article supplement (doi:10.1039/c3gc41968a), 2013-10-30
Supplement: c3gc41968a.pdf [file c3gc41968a.pdf]

# Laccase-catalyzed synthesis of catechol thioethers by reaction of catechols with thiols using air as an oxidant

Heba T. Abdel-Mohsen, Jürgen Conrad and Uwe Beifuss\*

*Bioorganische Chemie, Institut für Chemie, Universität Hohenheim*

*Garbenstr. 30, D-70599 Stuttgart, Germany*

*Fax: (+49) 711 459 22951; Tel: (+49) 711 459 22171*

*E-mail: [ubeifuss@uni-hohenheim.de](mailto:ubeifuss@uni-hohenheim.de)*

## Electronic Supplementary Information

### Table of contents

---

|                                                                                                                                                                      |    |
|----------------------------------------------------------------------------------------------------------------------------------------------------------------------|----|
| 1. General remarks                                                                                                                                                   | 2  |
| 2. General procedure for the laccase-catalyzed domino reaction between catechols and thiols                                                                          | 2  |
| 3. Synthesis and analytical data of catechol thioethers                                                                                                              | 3  |
| 4. Computational studies of compounds <b>3a</b> and <b>3b</b>                                                                                                        | 30 |
| 5. Calculation of the E-factor, atom economy, TON and TOF of the laccase-catalyzed domino reaction of catechol ( <b>1a</b> ) and 2-mercaptobenzoxazole ( <b>2a</b> ) | 33 |
| 6. References                                                                                                                                                        | 35 |

---

## 1. General remarks

All chemicals were purchased from commercial suppliers. Laccase from *Agaricus bisporus* (6 U / mg) was purchased from ASA Spezialenzyme. Solvents used in extraction and purification were distilled prior to use. The pH of the buffer was adjusted using a pH 330/SET-1 pH-meter. Analytical thin layer chromatography (TLC) was performed on precoated silica gel 60 F<sub>245</sub> aluminium plates (Merck) with visualization under UV light. Flash chromatography was carried out on silica gel MN 60, 0.04-0.053 mm (Macherey & Nagel). Melting points were determined on a Büchi melting point apparatus B-545 with open capillary tubes and are uncorrected. UV/VIS spectra were recorded with a Varian Cary 50. IR spectra were measured on a Perkin-Elmer *Spectrum One* (FT-IR-spectrometer). <sup>1</sup>H and <sup>13</sup>C NMR spectra were recorded at 300 (75) MHz on a Varian <sup>Unity</sup>Inova using DMSO-*d*<sub>6</sub>. The chemical shifts were referenced to the solvent signals at  $\delta_{\text{H/C}}$  2.49 / 39.50 ppm (DMSO-*d*<sub>6</sub>) relative to TMS as internal standards. gHSQC, gHMBC and gCOSY spectra were recorded on a Varian <sup>Unity</sup>Inova spectrometer (300 MHz). Coupling constants *J* [Hz] were directly taken from the spectra and are not averaged. Low resolution electron impact mass spectra (EI-LRMS) and exact electron impact mass spectra (HRMS) were recorded at 70 eV on a Finnigan MAT 95 instrument. Low resolution electron spray ionisation mass spectra (ESI-LRMS) and exact electron spray ionisation mass spectra (HRMS) were recorded on a Bruker Daltonics (micro TOFQ) instrument. The intensities are reported as percentages relative to the base peak (*I* = 100%).

## 2. General procedure for the laccase-catalyzed domino reaction between catechols and thiols

A 100 mL round bottomed flask with a magnetic stir bar was charged with a solution or suspension of the catechol **1** (0.63 mmol) and the thiol **2** (0.50 mmol) in methanol (3 mL). Phosphate buffer (0.2 M, pH 6, 27 mL) and laccase from *A. bisporus* (10 mg, 6 U/ mg) were added and the mixture was stirred under air at rt for the time given. The reaction mixture was acidified with 2M HCl to pH ~ 4 and saturated with solid NaCl. The precipitated product was filtered with suction using a Buchner funnel. The filter cake was washed with aq NaCl (15%, 25 mL) and water. The crude products obtained after drying exhibit a purity of 90-95% (NMR). Analytically pure products were obtained by column filtration (CH<sub>2</sub>Cl<sub>2</sub>/EtOAc 5:1 to 1:1) of the crude products.

### 3. Synthesis and analytical data of catechol thioethers

#### 3.1. Synthesis and analytical data of 4-(benzo[*d*]oxazol-2'-ylthio)benzene-1,2-diol (**3a**)

According to the general procedure, catechol (**1a**) (69 mg, 0.63 mmol), 2-mercaptobenzoxazole (**2a**) (76 mg, 0.50 mmol), methanol (3 mL), phosphate buffer (0.2 M, pH 6.0, 27 mL) and laccase (60 U, 10 mg, *A. bisporus*) were reacted for 16 h. Workup gave 4-(benzo[*d*]oxazol-2'-ylthio)benzene-1,2-diol (**3a**) as a pale brown solid (121 mg, 93%), mp 155–157 °C (lit.<sup>1</sup> 126–126 °C);  $R_f = 0.54$  ( $\text{CH}_2\text{Cl}_2/\text{EtOAc} = 5:1$ );  $\lambda_{\text{max}}$  (MeCN)/nm 286 (log  $\epsilon$ , 4.20), 280 (4.16), 246 (3.17) and 202 (4.62);  $\tilde{\nu}_{\text{max}}$  (atr)/ $\text{cm}^{-1}$  3560 – 3160 (OH), 1517, 1493, 1452, 1217 and 1137;  $\delta_{\text{H}}$  (300 MHz;  $\text{DMSO-}d_6$ ) 6.85 (1H, d,  $^3J_{5\text{-H},6\text{-H}}$  8.1 Hz, 6-H), 7.00 (1H, dd,  $^3J_{5\text{-H},6\text{-H}}$  8.4 Hz,  $^4J_{3\text{-H},5\text{-H}}$  2.1 Hz, 5-H), 7.07 (1H, d,  $^4J_{3\text{-H},5\text{-H}}$  2.4 Hz, 3-H), 7.28 – 7.31 (2H, m, 5'-H and 6'-H), 7.57 – 7.62 (2H, m, 4'-H and 7'-H), 9.44 (1H, s, 1-OH or 2-OH), 9.59 (1H, s, 1-OH or 2-OH);  $\delta_{\text{C}}$  (75 MHz;  $\text{DMSO-}d_6$ ) 110.26 (C-7'), 113.68 (C-4), 116.58 (C-6), 118.51 (C-4'), 122.05 (C-3), 124.42 (C-5' or C-6'), 124.63 (C-5' or C-6'), 126.83 (C-5), 141.40 (C-3a'), 146.20 (C-2), 147.99 (C-1), 151.23 (C-7a'), 163.74 (C-2');  $m/z$  (EI, 70 eV) 259 ( $\text{M}^+$ , 100%), 226 ( $\text{M}^+ - \text{SH}$ , 9), 151 ( $\text{C}_7\text{H}_5\text{SNO}^+$ , 20), 119 (10) and 91 (12); HRMS (EI,  $\text{M}^+$ ) found: 259.0281; calcd for  $\text{C}_{13}\text{H}_9\text{SNO}_3$ : 259.0303.

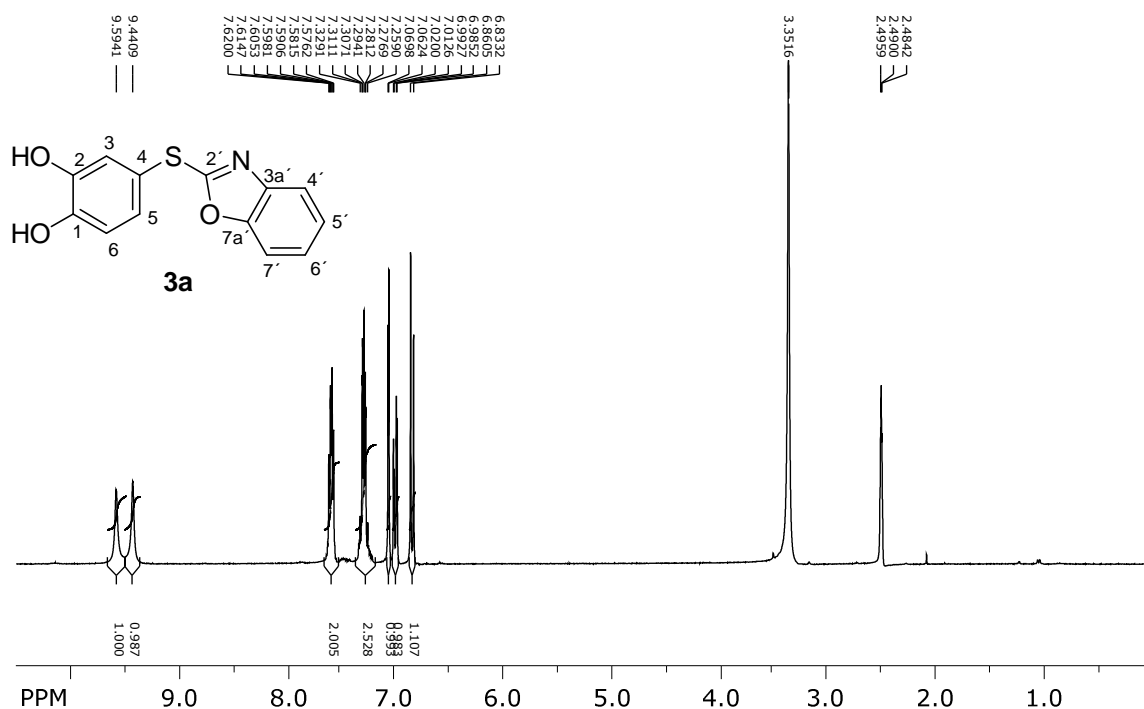

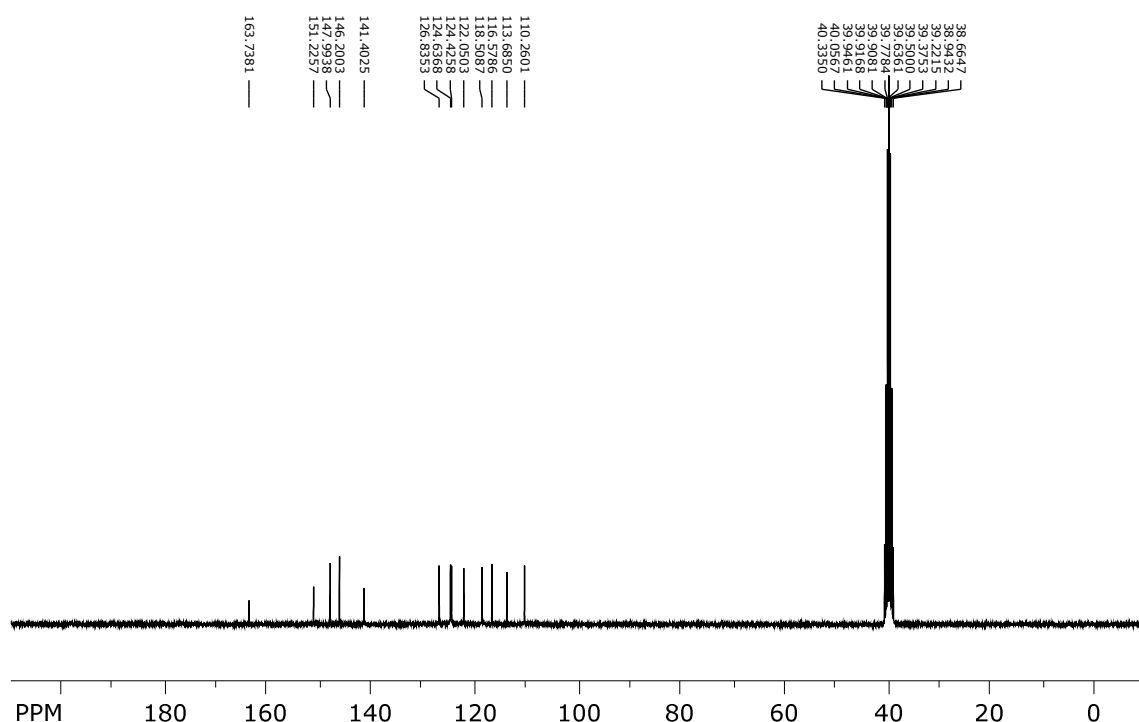

**Fig. 1**  $^1\text{H}$  (300 MHz) and  $^{13}\text{C}$  (75 MHz) NMR spectra of **3a** in  $\text{DMSO-}d_6$

### 3.2. Synthesis and analytical data of 4-(benzo[*d*]thiazol-2'-ylthio)benzene-1,2-diol (**3b**)

According to the general procedure, catechol (**1a**) (69 mg, 0.63 mmol), 2-mercaptobenzothiazole (**2b**) (84 mg, 0.50 mmol), methanol (3 mL), phosphate buffer (0.2 M, pH 6.0, 27 mL) and laccase (60 U, 10 mg, *A. bisporus*) were reacted for 17 h. Workup gave 4-(benzo[*d*]thiazol-2'-ylthio)benzene-1,2-diol (**3b**) as a pale yellow solid (120 mg, 87%); mp 198–200 °C;  $R_f = 0.53$  ( $\text{CH}_2\text{Cl}_2/\text{EtOAc} = 5:1$ );  $\lambda_{\text{max}}(\text{MeCN})/\text{nm}$  284 (log  $\epsilon$ , 4.60) and 206 (4.20);  $\tilde{\nu}_{\text{max}}(\text{atr})/\text{cm}^{-1}$  3426 (OH), 3054 (C-H), 1593, 1415, 1270 and 1030;  $\delta_{\text{H}}$  (300 MHz;  $\text{DMSO-}d_6$ ) 6.90 (1H, d,  $^3J_{5\text{-H},6\text{-H}}$  8.1 Hz, 6-H), 7.07 (1H, dd,  $^3J_{5\text{-H},6\text{-H}}$  8.4 Hz,  $^4J_{3\text{-H},5\text{-H}}$  2.1 Hz, 5-H), 7.13 (1H, d,  $^4J_{3\text{-H},5\text{-H}}$  2.1 Hz, 3-H), 7.29 (1H, ddd,  $^3J_{5\text{-H},6\text{-H}}$  7.2 or 7.9 Hz,  $^3J_{6\text{-H},7\text{-H}}$  7.2 or 7.9 Hz,  $^4J_{4\text{-H},6\text{-H}}$  1.1 Hz, 6'-H), 7.42 (1H, ddd,  $^3J_{4\text{-H},5\text{-H}}$  7.3 or 8.2 Hz,  $^3J_{5\text{-H},6\text{-H}}$  7.3 or 8.2 Hz,  $^4J_{5\text{-H},7\text{-H}}$  1.3 Hz, 5'-H), 7.79 (1H, ddd,  $^3J_{4\text{-H},5\text{-H}}$  8.1 Hz,  $^4J_{4\text{-H},6\text{-H}}$  1.2 or 0.6 Hz,  $^5J_{4\text{-H},7\text{-H}}$  1.2 or 0.6 Hz, 4'-H), 7.89 (1H, ddd,  $^3J_{6\text{-H},7\text{-H}}$  8.0 Hz,  $^4J_{5\text{-H},7\text{-H}}$  1.3 or 0.7 Hz,  $^5J_{4\text{-H},7\text{-H}}$  1.3 or 0.7 Hz, 7'-H) and 9.63 (2H, br, 1-OH and 2-OH);  $\delta_{\text{C}}$  (75 MHz;  $\text{DMSO-}d_6$ ) 116.66 (C-4), 117.01 (C-6), 121.12 (C-4'), 121.64 (C-7'), 122.45 (C-3), 124.13 (C-6'), 126.27 (C-5'), 127.66 (C-5), 134.75 (C-7a'), 146.61 (C-2), 148.66 (C-1), 153.71 (C-3a') and 171.99 (C-2');  $m/z$  (EI, 70

eV) 275 ( $M^+$ , 100%), 242 ( $M^+ - SH$ , 5), 167 ( $C_7H_5S_2N^+$ , 8) and 115 (15); HRMS (EI,  $M^+$ )  
found: 275.0051; calcd for  $C_{13}H_9S_2NO_2$ : 275.0075.

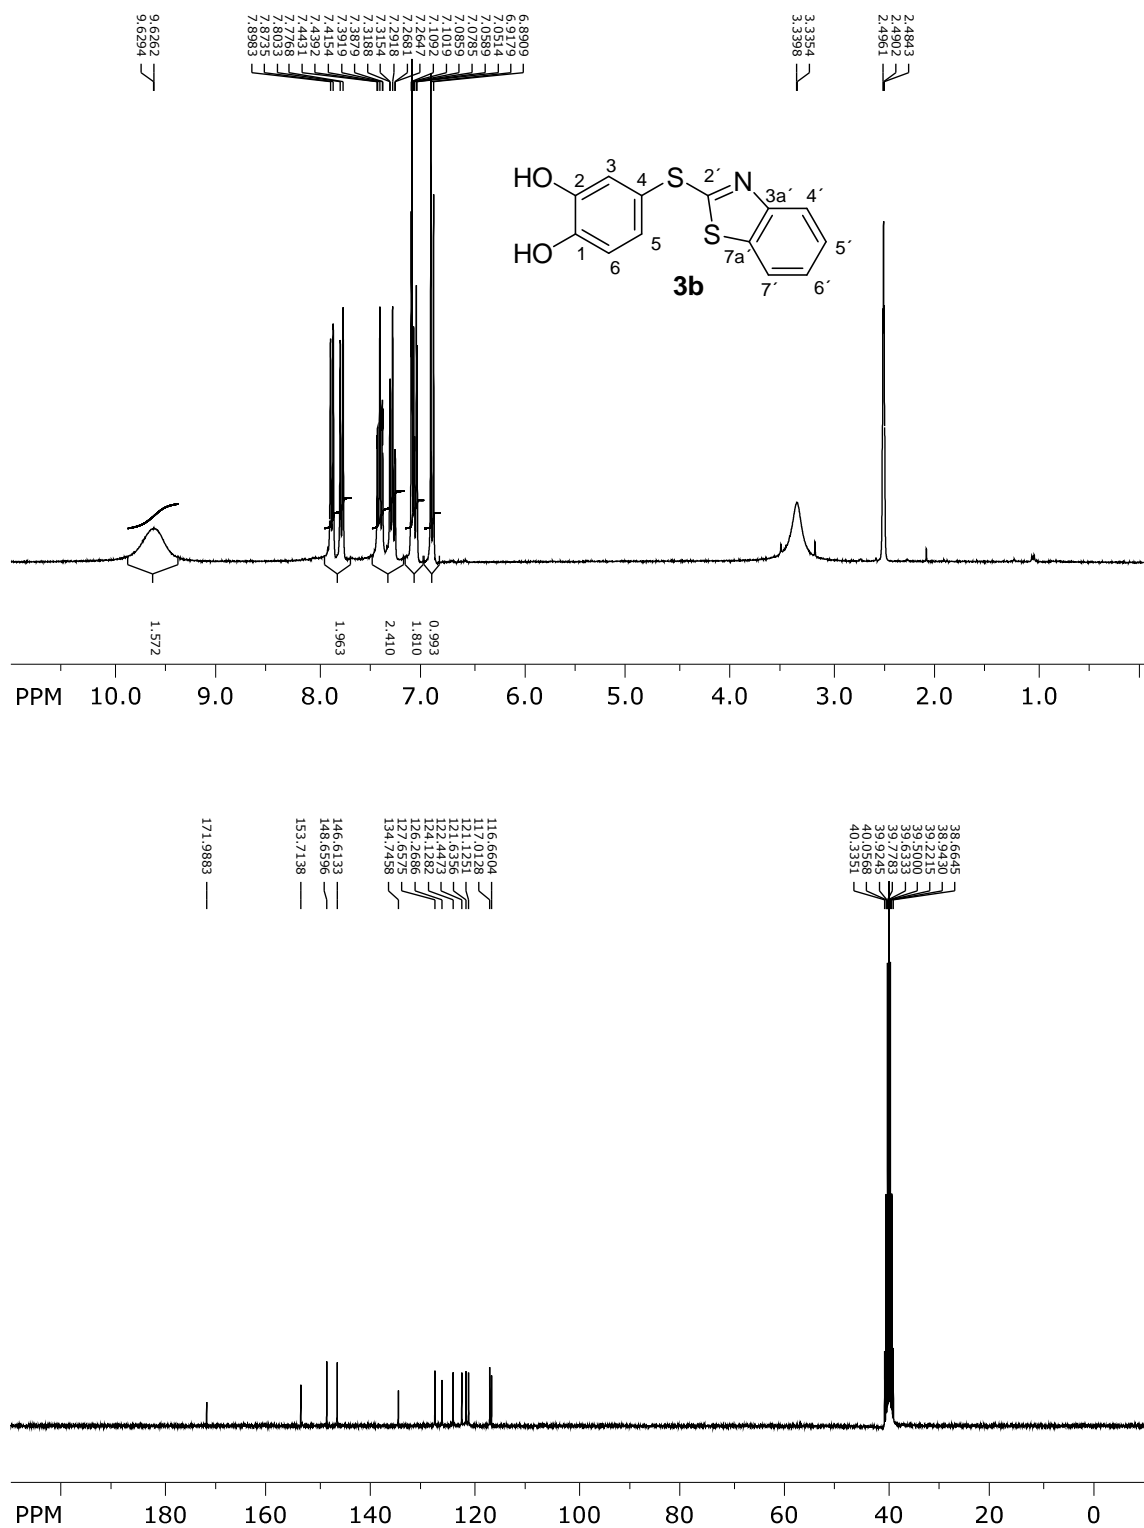

**Fig. 2**  $^1H$  (300 MHz) and  $^{13}C$  (75 MHz) NMR spectra of **3b** in  $DMSO-d_6$

### 3.3. Synthesis and analytical data of 4-(benzo[*d*]oxazol-2'-ylthio)-3-methylbenzene-1,2-diol (**3c**) and 5-(benzo[*d*]oxazol-2'-ylthio)-3-methylbenzene-1,2-diol (**5c**)

According to the general procedure, 3-methylcatechol (**1b**) (78 mg, 0.63 mmol), 2-mercaptobenzoxazole (**2a**) (76 mg, 0.50 mmol), methanol (3 mL), phosphate buffer (0.2 M, pH 6.0, 27 mL) and laccase (60 U, 10 mg, *A. bisporus*) were reacted for 24 h. Workup gave a mixture of 4-(benzo[*d*]oxazol-2'-ylthio)-3-methylbenzene-1,2-diol (**3c**) and 5-(benzo[*d*]oxazol-2'-ylthio)-3-methylbenzene-1,2-diol (**5c**) as a brown solid (123 mg, 90%), mp 181–183 °C;  $R_f = 0.64$  (CH<sub>2</sub>Cl<sub>2</sub>/EtOAc = 5:1);  $\lambda_{\max}$ (MeCN)/nm 286 (log  $\epsilon$ , 4.25), 279 (4.23), 247 (4.24) and 206 (4.66);  $\tilde{\nu}_{\max}$  (atr)/cm<sup>-1</sup> 3471 (OH), 1592, 1500, 1452, 1235 and 1138;  $\delta_H$  (300 MHz; DMSO-*d*<sub>6</sub>) of **3c** 2.21 (3H, s, CH<sub>3</sub>), 6.74 (1H, d, <sup>3</sup>*J*<sub>5-H,6-H</sub> 8.2 Hz, 6-H), 7.05 (1H, d, <sup>3</sup>*J*<sub>5-H,6-H</sub> 8.3 Hz, 5-H), 7.24 – 7.31 (2H, m, 5'-H and 6'-H), 7.55 – 7.58 (2H, m, 4'-H and 7'-H), 8.68 (1H, br, 1-OH or 2-OH) and 9.85 (1H, br, 1-OH or 2-OH);  $\delta_H$  (300 MHz; DMSO-*d*<sub>6</sub>) of **5c** 2.13 (3H, s, CH<sub>3</sub>), 6.94 (1H, d, <sup>4</sup>*J*<sub>4-H,6-H</sub> 3.0 Hz, 4-H), 6.96 (1H, d, <sup>4</sup>*J*<sub>4-H,6-H</sub> 3.0 Hz, 6-H), 7.24 – 7.31 (2H, m, 5'-H and 6'-H), 7.55 – 7.58 (2H, m, 4'-H and 7'-H), 8.80 (1H, br, 1-OH or 2-OH) and 9.71 (1H, br, 1-OH or 2-OH);  $\delta_C$  (75 MHz; DMSO-*d*<sub>6</sub>) of **3c** 14.06 (CH<sub>3</sub>), 110.20 (C-7'), 113.29 (C-6), 114.35 (C-4), 118.40 (C-4'), 124.25 (C-5' or C-6'), 124.57 (C-5' or C-6'), 127.70 (C-5), 129.39 (C-3), 141.47 (C-3a'), 144.43 (C-2), 147.80 (C-1), 151.23 (C-7a') and 163.71 (C-2');  $\delta_C$  (75 MHz; DMSO-*d*<sub>6</sub>) of **5c** 15.79 (CH<sub>3</sub>), 110.26 (C-7'), 112.80 (C-5), 118.40 (C-4'), 119.45 (C-6), 124.41 (C-5' or C-6'), 124.62 (C-5' or C-6'), 125.92 (C-3), 128.20 (C-4), 141.47 (C-3a'), 145.54 (C-1), 145.99 (C-2), 151.23 (C-7a') and 163.82 (C-2'); *m/z* (EI, 70 eV) 273 (M<sup>+</sup>, 100%), 240 (M<sup>+</sup> – SH, 7), 166 (18) and 73 (13); HRMS (EI, M<sup>+</sup>) found: 273.0445; calcd for C<sub>14</sub>H<sub>11</sub>SNO<sub>3</sub>: 273.0460.

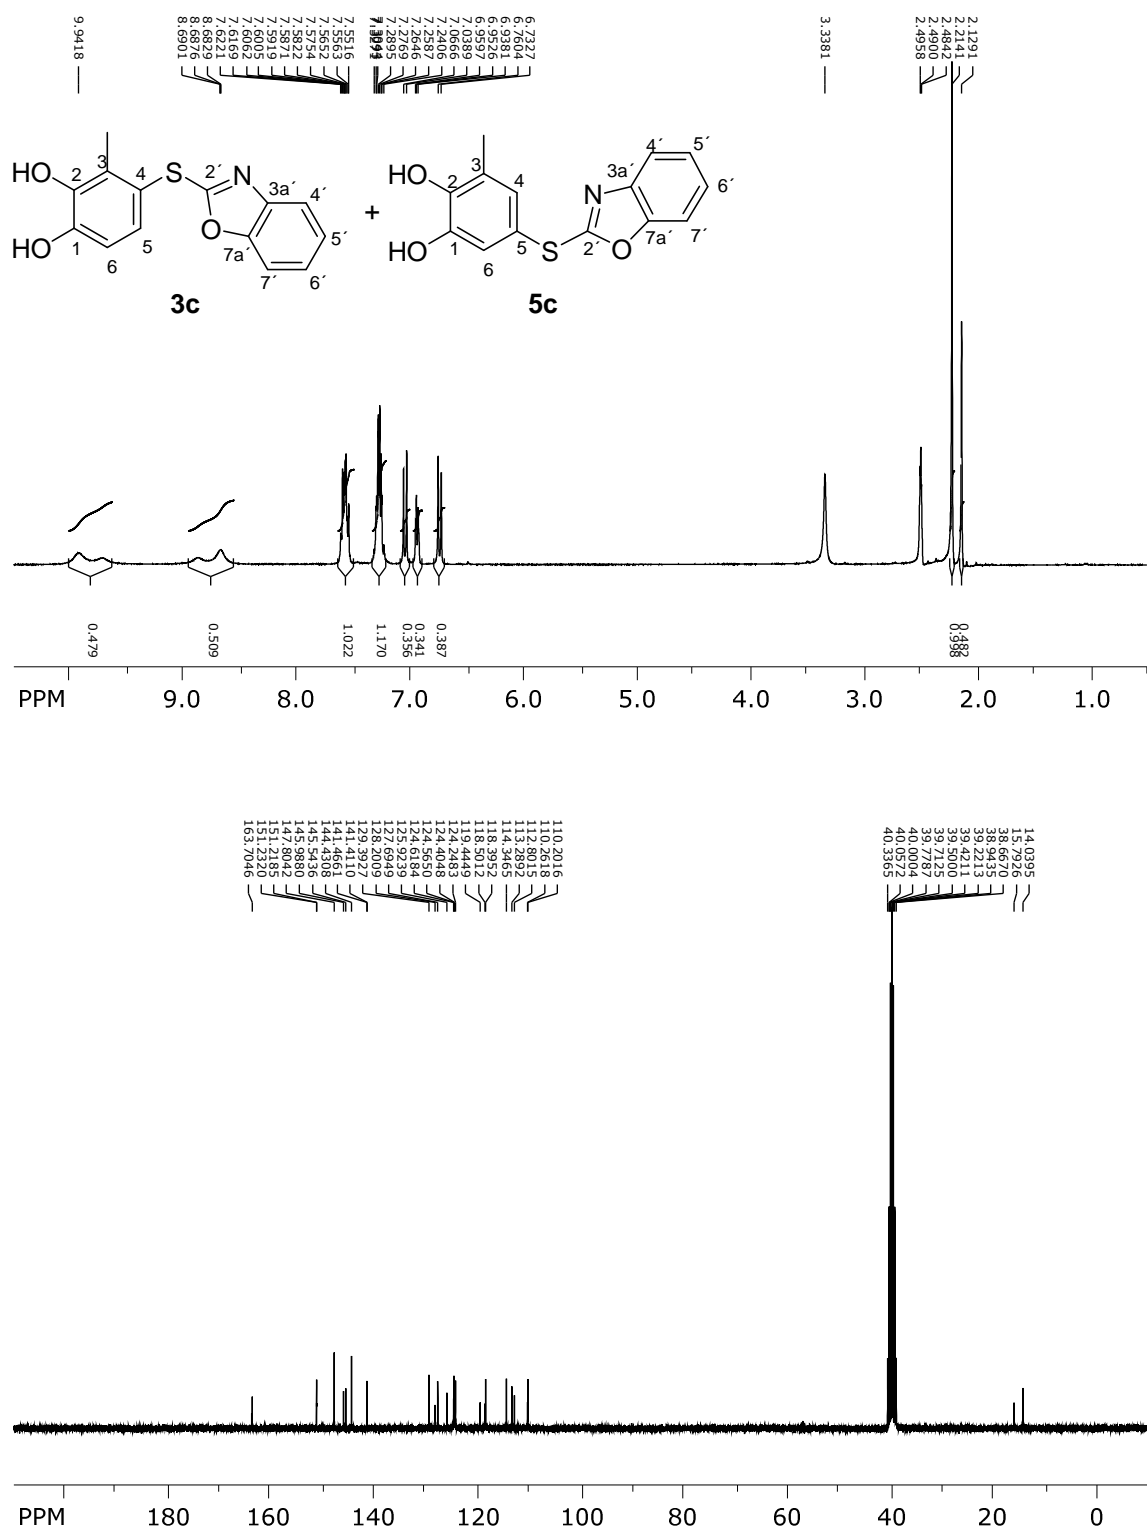

**Fig. 3**  $^1\text{H}$  (300 MHz) and  $^{13}\text{C}$  (75 MHz) NMR spectra of **3c** and **5c** in  $\text{DMSO-}d_6$

### 3.4. Synthesis and analytical data of 4-(benzo[*d*]thiazol-2'-ylthio)-3-methylbenzene-1,2-diol (**3d**) and 5-(benzo[*d*]thiazol-2'-ylthio)-3-methylbenzene-1,2-diol (**5d**)

According to the general procedure, 3-methylcatechol (**1b**) (78 mg, 0.63 mmol), 2-mercaptobenzothiazole (**2b**) (84 mg, 0.50 mmol), methanol (3 mL), phosphate buffer (0.2 M, pH 6.0, 27 mL) and laccase (60 U, 10 mg, *A. bisporus*) were reacted for 17 h. Workup gave a mixture of 4-(benzo[*d*]thiazol-2'-ylthio)-3-methylbenzene-1,2-diol (**3d**) and 5-(benzo[*d*]thiazol-2'-ylthio)-3-methylbenzene-1,2-diol (**5d**) as a pale brown solid (138 mg, 95%); mp 186–188 °C;  $R_f = 0.74$  (CH<sub>2</sub>Cl<sub>2</sub>/EtOAc = 5:1);  $\lambda_{\max}$ (MeCN)/nm 289 (log  $\epsilon$ , 4.20), 282 (4.21) and 211 (4.59);  $\tilde{\nu}_{\max}$  (atr)/cm<sup>-1</sup> 3260 (OH), 1453, 1416, 1415, 1270 and 1010;  $\delta_H$  (300 MHz; DMSO-*d*<sub>6</sub>) of **3d** 2.26 (3H, s, CH<sub>3</sub>), 6.81 (1H, d, <sup>3</sup>*J*<sub>5-H,6-H</sub> 8.4 Hz, 6-H), 7.11 (1H, d, <sup>3</sup>*J*<sub>5-H,6-H</sub> 8.3 Hz, 5-H), 7.27 – 7.31 (1H, m, 6'-H), 7.41 (1H, t like ov, <sup>3</sup>*J* ~ 8.1 Hz, 5'-H), 7.78 (1H, d like ov, <sup>3</sup>*J* ~ 8.1 Hz, 4'-H), 7.87 (1H, t like ov, <sup>3</sup>*J* ~ 8.1 Hz, 7'-H) and 8.78 (2H, br, 1-OH and 2-OH);  $\delta_H$  (300 MHz; DMSO-*d*<sub>6</sub>) of **5d** 2.15 (3H, s, CH<sub>3</sub>), 7.02 (1H, d, <sup>4</sup>*J*<sub>4-H,6-H</sub> 1.8 Hz, 6-H), 7.04 (1H, d, <sup>4</sup>*J*<sub>4-H,6-H</sub> 1.8 Hz, 4-H), 7.27 – 7.31 (1H, m, 6'-H), 7.41 (1H, t like ov, <sup>3</sup>*J* ~ 8.1 Hz, 5'-H), 7.78 (1H, d like ov, <sup>3</sup>*J* ~ 8.1 Hz, 4'-H), 7.87 (1H, t like ov, <sup>3</sup>*J* ~ 8.1 Hz, 7'-H) and 9.02 (2H, br, 1-OH and 2-OH);  $\delta_C$  (75 MHz; DMSO-*d*<sub>6</sub>) of **3d** 13.94 (CH<sub>3</sub>), 113.80 (C-6), 117.45 (C-4), 121.07 (C-4'), 121.11 (C-7'), 123.98 (C-6'), 126.24 (C-5'), 128.34 (C-5), 129.48 (C-3), 134.79 (C-7a'), 144.74 (C-2), 148.30 (C-1), 153.88 (C-3a') and 171.94 (C-2');  $\delta_C$  (75 MHz; DMSO-*d*<sub>6</sub>) of **5d** 15.83 (CH<sub>3</sub>), 115.83 (C-5), 119.79 (C-6), 121.07 (C-4'), 121.11 (C-7'), 124.10 (C-6'), 126.46 (C-3), 126.21 (C-5'), 128.92 (C-4), 134.76 (C-7a'), 145.90 (C-1), 146.63 (C-2), 153.73 (C-3a') and 172.14 (C-2');  $m/z$  (EI, 70 eV) 289 (M<sup>+</sup>, 100%), 256 (M<sup>+</sup> – SH, 68), 210 (16) and 167 (C<sub>7</sub>H<sub>5</sub>NS<sub>2</sub><sup>+</sup>, 18); HRMS (EI, M<sup>+</sup>) found: 289.0246; calcd for C<sub>14</sub>H<sub>11</sub>NO<sub>2</sub>S<sub>2</sub>: 289.0231.



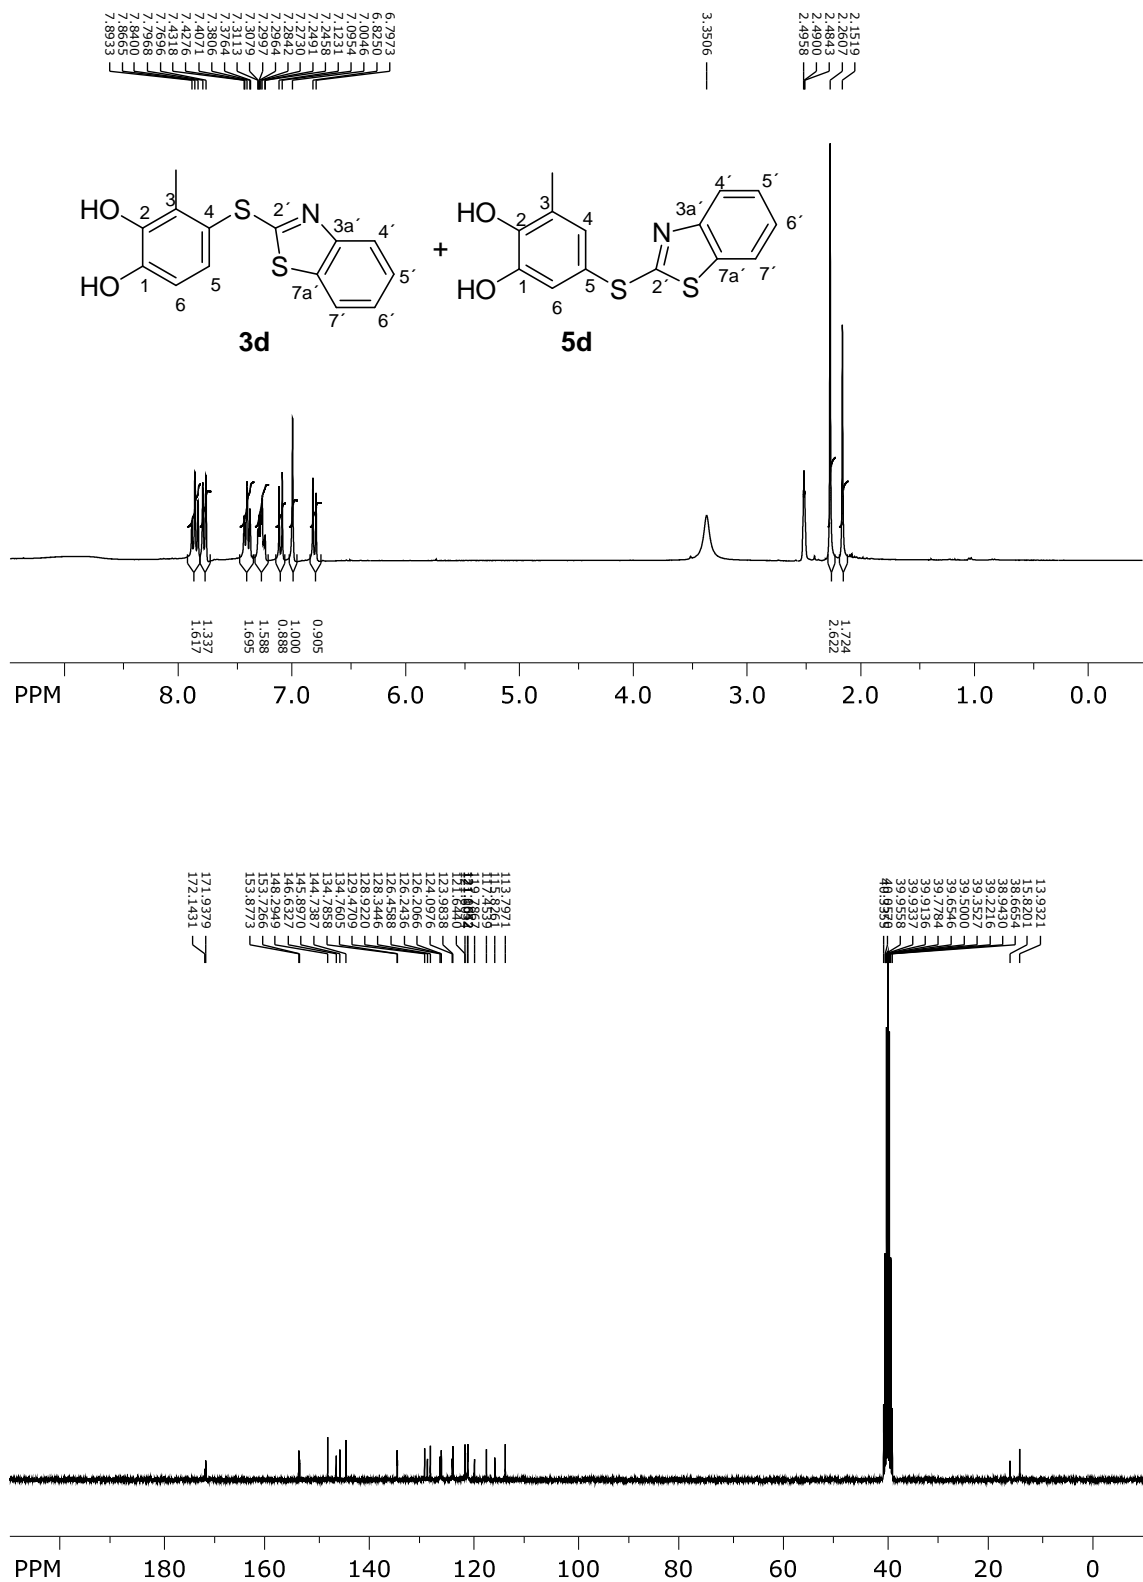

**Fig. 4** <sup>1</sup>H (300 MHz) and <sup>13</sup>C (75 MHz) NMR spectra of **3d** and **5d** in DMSO-*d*<sub>6</sub>

### 3.5. Synthesis and analytical data of 4-(benzo[*d*]oxazol-2'-ylthio)-3-methoxybenzene-1,2-diol (**3e**) and 5-(benzo[*d*]oxazol-2'-ylthio)-3-methoxybenzene-1,2-diol (**5e**)

According to the general procedure, 3-methoxycatechol (**1c**) (88 mg, 0.63 mmol), 2-mercaptobenzoxazole (**2a**) (76 mg, 0.50 mmol), methanol (3 mL), phosphate buffer (0.2 M, pH 6.0, 27 mL) and laccase (60 U, 10 mg, *A. bisporus*) were reacted for 17 h. Workup gave a mixture of 4-(benzo[*d*]oxazol-2'-ylthio)-3-methoxybenzene-1,2-diol (**3e**) and 5-(benzo[*d*]oxazol-2'-ylthio)-3-methoxybenzene-1,2-diol (**5e**) as a pale brown solid (140 mg, 96%), mp 150–152 °C;  $R_f = 0.43$  (CH<sub>2</sub>Cl<sub>2</sub>/EtOAc = 5:1);  $\lambda_{\max}$ (MeCN)/nm 286 (log  $\epsilon$ , 4.18), 279 (4.19), 249 (4.19) and 208 (4.59);  $\tilde{\nu}_{\max}$  (atr)/cm<sup>-1</sup> 3300 (OH), 2994 (C-H), 1499, 1450, 1200, 1131 and 1095;  $\delta_H$  (300 MHz; DMSO-*d*<sub>6</sub>) of **3e** 3.68 (3H, s, OCH<sub>3</sub>), 6.67 (1H, d, <sup>3</sup> $J_{5-H,6-H}$  8.5 Hz, 6-H), 6.96 (1H, d, <sup>3</sup> $J_{5-H,6-H}$  8.4 Hz, 5-H), 7.23 – 7.31 (2H, m, 5'-H and 6'-H), 7.56 – 7.63 (2H, m, 4'-H and 7'-H) and 9.22 (2H, br, 1-OH and 2-OH);  $\delta_H$  (300 MHz; DMSO-*d*<sub>6</sub>) of **5e** 3.74 (3H, s, OCH<sub>3</sub>), 6.79 (1H, d, <sup>4</sup> $J_{4-H,6-H}$  3.0 Hz, 6-H), 6.82 (1H, d, <sup>4</sup> $J_{4-H,6-H}$  3.0 Hz, 4-H), 7.23 – 7.31 (2H, m, 5'-H and 6'-H), 7.56 – 7.63 (2H, m, 4'-H and 7'-H) and 9.22 (2H, br, 1-OH and 2-OH);  $\delta_C$  (75 MHz; DMSO-*d*<sub>6</sub>) of **3e** 60.16 (OCH<sub>3</sub>), 108.22 (C-4), 110.11 (C-7'), 111.71 (C-6), 118.41 (C-4'), 124.26 (C-5' or C-6'), 124.58 (C-5' or C-6'), 126.21 (C-5), 139.41 (C-2), 141.50 (C-3a'), 149.37 (C-1), 150.05 (C-3), 151.16 (C-7a') and 163.63 (C-2');  $\delta_C$  (75 MHz; DMSO-*d*<sub>6</sub>) of **5e** 56.05 (OCH<sub>3</sub>), 110.20 (C-7'), 110.29 (C-4), 113.11 (C-5), 116.11 (C-6), 118.54 (C-4'), 124.44 (C-5' or C-6'), 124.64 (C-5' or C-6'), 136.78 (C-2), 141.44 (C-3a'), 146.38 (C-1), 148.76 (C-3), 151.24 (C-7a') and 163.59 (C-2');  $m/z$  (EI, 70 eV) 289 (M<sup>+</sup>, 17%), 287 (M<sup>+</sup> – 2, 100), 274 (M<sup>+</sup> – CH<sub>3</sub>, 15), 256 (M<sup>+</sup> – SH, 20), 255 (50) and 240 (60); HRMS (EI, M<sup>+</sup>) found: 289.0413; calcd for C<sub>14</sub>H<sub>11</sub>SNO<sub>4</sub>: 289.0409.

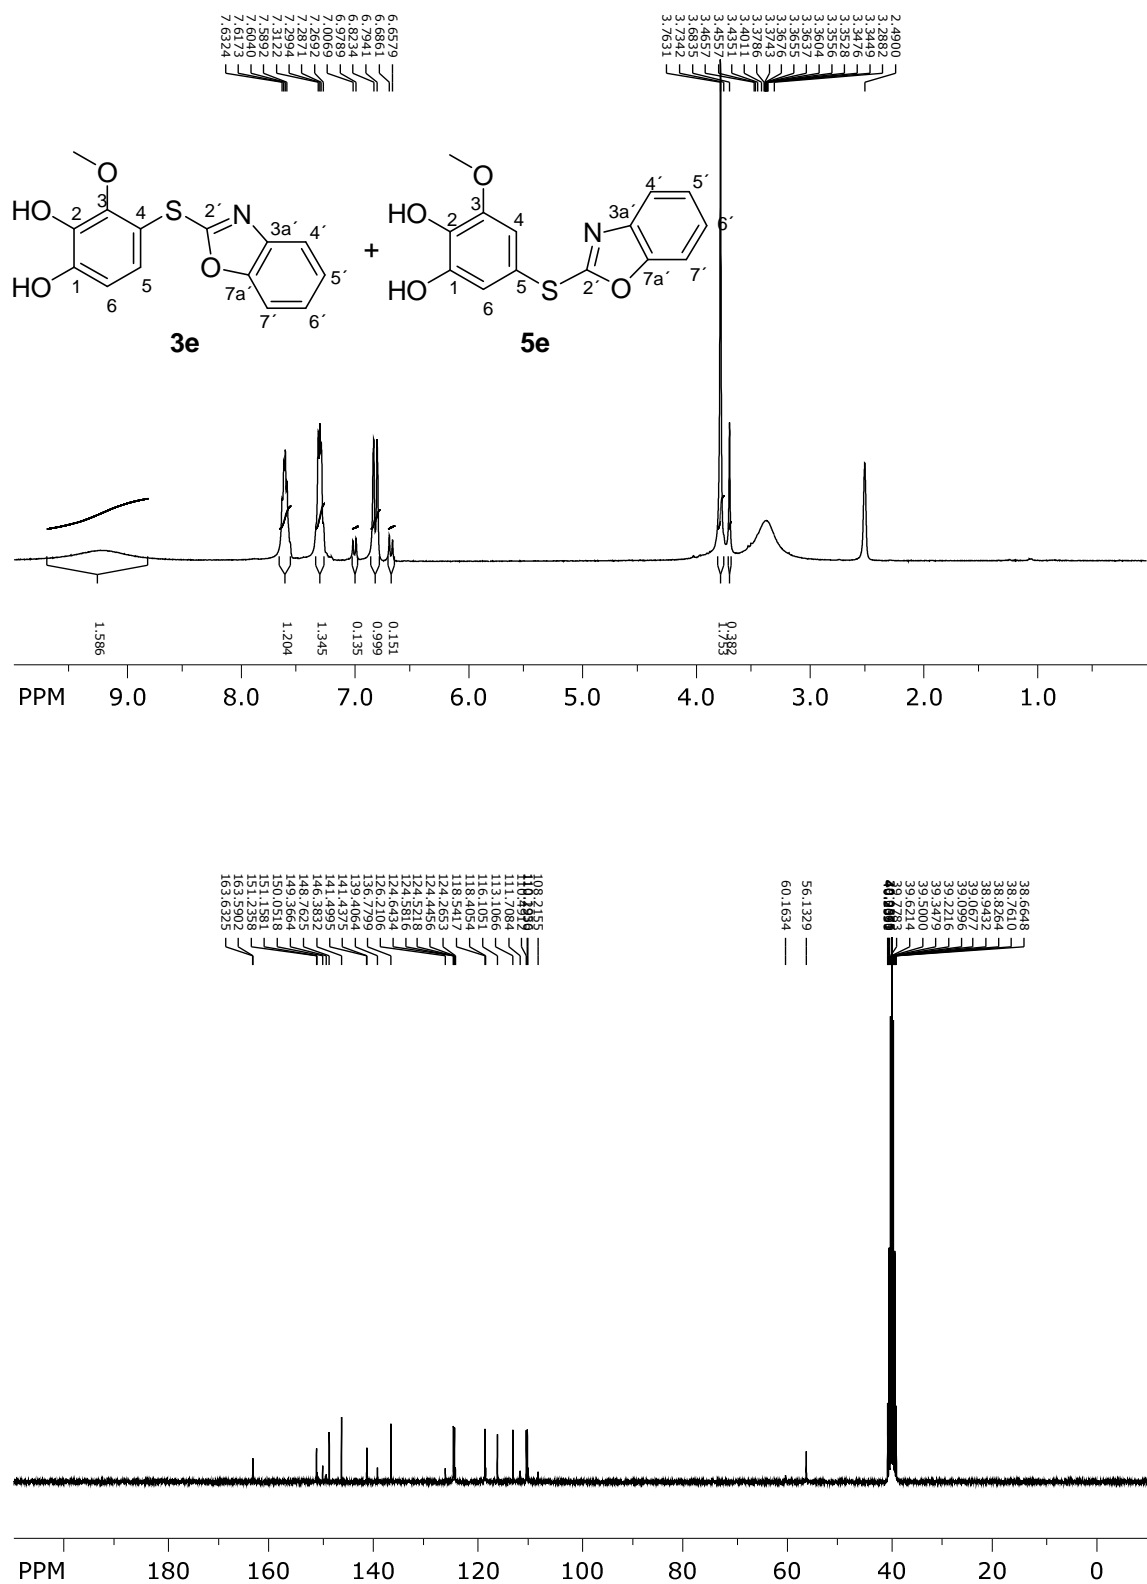

**Fig. 5** <sup>1</sup>H (300 MHz) and <sup>13</sup>C (75 MHz) NMR spectra of **3e** and **5e** in DMSO-*d*<sub>6</sub>

### 3.6. Synthesis and analytical data of 4-(benzo[*d*]thiazol-2'-ylthio)-3-methoxybenzene-1,2-diol (**3f**) and 5-(benzo[*d*]thiazol-2'-ylthio)-3-methoxybenzene-1,2-diol (**5f**)

According to the general procedure, 3-methoxycatechol (**1c**) (88 mg, 0.63 mmol), 2-mercaptobenzothiazole (**2b**) (84 mg, 0.50 mmol), methanol (3 mL), phosphate buffer (0.2 M, pH 6.0, 27 mL) and laccase (60 U, 10 mg, *A. bisporus*) were reacted for 17 h. Workup gave a mixture of 4-(benzo[*d*]thiazol-2'-ylthio)-3-methoxybenzene-1,2-diol (**3f**) and 5-(benzo[*d*]thiazol-2'-ylthio)-3-methoxybenzene-1,2-diol (**5f**) as a pale brown solid (145 mg, 95%); mp 108–110 °C;  $R_f = 0.55$  (CH<sub>2</sub>Cl<sub>2</sub>/EtOAc = 5:1);  $\lambda_{\max}$ (MeCN)/nm 279 (log  $\epsilon$ , 4.19) and 217 (4.55);  $\tilde{\nu}_{\max}$  (atr)/cm<sup>-1</sup> 3400 (OH), 3058 (C-H), 1599, 1504, 1420, 1196 and 1084;  $\delta_H$  (300 MHz; DMSO-*d*<sub>6</sub>) of **3f** 3.72 (3H, s, OCH<sub>3</sub>), 6.72 (1H, d, <sup>3</sup>*J*<sub>5-H,6-H</sub> 8.3 Hz, 6-H), 7.07 (1H, d, <sup>3</sup>*J*<sub>5-H,6-H</sub> 8.3 Hz, 5-H), 7.31 (1H, t like ov, <sup>3</sup>*J* ~ 8.0 Hz, 6'-H), 7.42 (1H, t like ov, <sup>3</sup>*J* ~ 8.0 Hz, 5'-H), 7.78 (1H, d like ov, <sup>3</sup>*J* ~ 7.8 Hz, 4'-H), 7.90 (1H, d like ov, <sup>3</sup>*J* ~ 7.8 Hz, 7'-H) and 9.27 (2H, br, 1-OH and 2-OH);  $\delta_H$  (300 MHz; DMSO-*d*<sub>6</sub>) of **5f** 3.78 (3H, s, OCH<sub>3</sub>), 6.84 (1H, d, <sup>4</sup>*J*<sub>4-H,6-H</sub> 2.0 Hz, 6-H), 6.89 (1H, d, <sup>4</sup>*J*<sub>4-H,6-H</sub> 2.0 Hz, 4-H), 7.31 (1H, t like ov, <sup>3</sup>*J* ~ 8.0 Hz, 6'-H), 7.42 (1H, t like ov, <sup>3</sup>*J* ~ 8.0 Hz, 5'-H), 7.78 (1H, d like ov, <sup>3</sup>*J* ~ 7.8 Hz, 4'-H), 7.90 (1H, d like ov, <sup>3</sup>*J* ~ 7.8 Hz, 7'-H) and 9.27 (2H, br, 1-OH and 2-OH);  $\delta_C$  (75 MHz; DMSO-*d*<sub>6</sub>) of **3f** 56.18 (OCH<sub>3</sub>), 111.04 (C-4), 112.15 (C-6), 121.06 (C-4'), 121.56 (C-7'), 124.03 (C-6'), 126.20 (C-5'), 127.32 (C-5), 134.71 (C-7a'), 139.63 (C-2), 149.72 (C-1), 150.68 (C-3), 153.72 (C-3a') and 169.92 (C-2');  $\delta_C$  (75 MHz; DMSO-*d*<sub>6</sub>) of **5f** 56.92 (OCH<sub>3</sub>), 111.01 (C-4), 115.98 (C-5), 116.54 (C-6), 121.13 (C-4'), 121.65 (C-7'), 124.14 (C-6'), 126.26 (C-5'), 134.77 (C-7a'), 137.44 (C-2), 146.74 (C-1), 149.13 (C-3), 153.70 (C-3a') and 171.88 (C-2');  $m/z$  (EI, 70 eV) 307 (M<sup>+</sup> + 2, 45%), 305 (M<sup>+</sup>, 100), 290 (M<sup>+</sup> - CH<sub>3</sub>, 28) and 274 (M<sup>+</sup> - OCH<sub>3</sub>, 24); HRMS (EI, M<sup>+</sup>) found: 305.0122; calcd for C<sub>14</sub>H<sub>11</sub>NO<sub>3</sub>S<sub>2</sub>: 305.0180;  $m/z$  (ESI) 328 (M<sup>+</sup> + Na, 100%) and 306 (M<sup>+</sup> + 1, 30); HRMS (ESI, M<sup>+</sup> + Na) found: 328.0076; calcd for C<sub>14</sub>H<sub>11</sub>NO<sub>3</sub>S<sub>2</sub>Na: 328.0073.

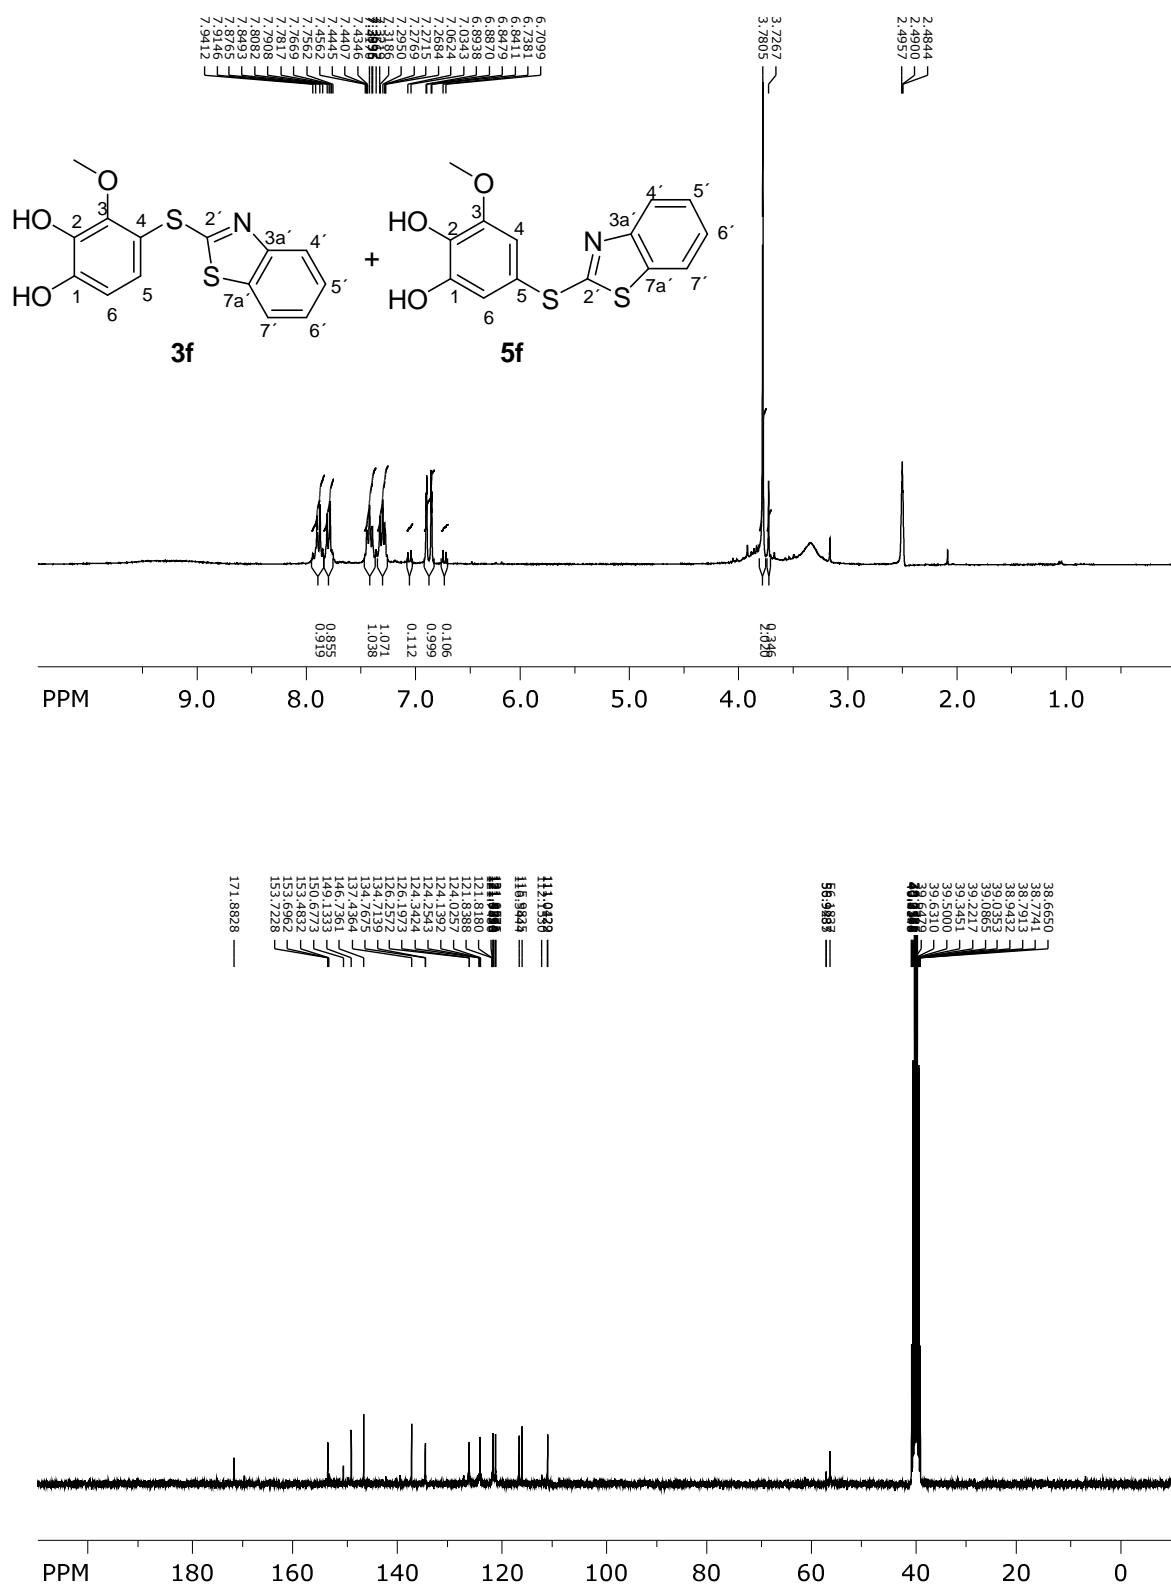

**Fig. 6** <sup>1</sup>H (300 MHz) and <sup>13</sup>C (75 MHz) NMR spectra of **3f** and **5f** in DMSO-*d*<sub>6</sub>

### 3.7. Synthesis and analytical data of 4-(benzo[*d*]oxazol-2'-ylthio)-3-fluorobenzene-1,2-diol (**3g**) and 5-(benzo[*d*]oxazol-2'-ylthio)-3-fluorobenzene-1,2-diol (**5g**)

According to the general procedure, 3-fluorocatechol (**1d**) (81 mg, 0.63 mmol), 2-mercaptobenzoxazole (**2a**) (76 mg, 0.50 mmol), methanol (3 mL), phosphate buffer (0.2 M, pH 6.0, 27 mL) and laccase (60 U, 10 mg, *A. bisporus*) were reacted for 17 h. Workup gave a mixture of 4-(benzo[*d*]oxazol-2'-ylthio)-3-fluorobenzene-1,2-diol (**3g**) and 5-(benzo[*d*]oxazol-2'-ylthio)-3-fluorobenzene-1,2-diol (**5g**) as a pale yellow solid (125 mg, 90%); mp 183–185 °C;  $R_f = 0.36$  (CH<sub>2</sub>Cl<sub>2</sub>/EtOAc = 5:1);  $\lambda_{\max}$ (MeCN)/nm 285 (log  $\epsilon$ , 4.18), 278 (4.18) and 247 (4.21);  $\tilde{\nu}_{\max}$  (atr)/cm<sup>-1</sup> 3470 (OH), 3064 (C-H), 1500, 1452 and 1138;  $\delta_H$  (300 MHz; DMSO-*d*<sub>6</sub>) of **3g** 6.73 (1H, dd, <sup>3</sup> $J_{5-H,6-H}$  8.6 Hz, <sup>5</sup> $J_{6-H,F}$  1.4 Hz, 6-H), 7.06 (1H, dd, <sup>3</sup> $J_{5-H,6-H}$  8.6 Hz, <sup>4</sup> $J_{5-H,F}$  7.6 Hz, 5-H), 7.27 – 7.34 (2H, m, 5'-H and 6'-H), 7.58 – 7.64 (2H, m, 4'-H and 7'-H) and 9.78 (2H, br, 1-OH and 2-OH);  $\delta_H$  (300 MHz; DMSO-*d*<sub>6</sub>) of **5g** 7.00 (1H, dd, <sup>4</sup> $J_{4-H,6-H}$  1.6 or 2.1 Hz, <sup>5</sup> $J_{6-H,F}$  1.6 or 2.1 Hz, 6-H), 7.08 (1H, dd, <sup>4</sup> $J_{4-H,6-H}$  2.2 Hz, <sup>3</sup> $J_{4-H,F}$  10.1 Hz, 4-H), 7.27 – 7.34 (2H, m, 5'-H and 6'-H), 7.58 – 7.64 (2H, m, 4'-H and 7'-H) and 9.78 (2H, br, 1-OH and 2-OH);  $\delta_C$  (75 MHz; DMSO-*d*<sub>6</sub>) of **3g** 101.77 (d, <sup>2</sup> $J_{C-4,F}$  16.9 Hz, C-4), 110.34 (C-7'), 111.88 (d, <sup>4</sup> $J_{C-6,F}$  2.2 Hz, C-6), 118.56 (C-4'), 124.54 (C-5' or C-6'), 124.76 (C-5' or C-6'), 126.28 (br, C-5), 134.45 (d, <sup>2</sup> $J_{C-2,F}$  14.73 Hz, C-2), 141.32 (C-3a'), 151.24 (d, <sup>3</sup> $J_{C-1,F}$  6.1 Hz, C-1), 151.31 (C-7a'), 152.30 (d, <sup>1</sup> $J_{C-3,F}$  240.4 Hz, C-3) and 162.50 (C-2');  $\delta_C$  (75 MHz; DMSO-*d*<sub>6</sub>) of **5g** 113.45 (br, C-5), 113.66 (d, <sup>2</sup> $J_{C-4,F}$  10.6 Hz, C-4), 110.34 (C-7'), 118.08 (d, <sup>4</sup> $J_{C-6,F}$  2.2 Hz, C-6), 118.64 (C-4'), 124.54 (C-5' or C-6') 124.76 (C-5' or C-6'), 135.97 (d, <sup>2</sup> $J_{C-2,F}$  13.7 Hz, C-2), 141.32 (C-3a'), 148.18 (d, <sup>3</sup> $J_{C-1,F}$  6.5 Hz, C-1), 151.31 (C-7a'), 151.64 (d, <sup>1</sup> $J_{C-3,F}$  240.5 Hz, C-3) and 163.01 (C-2');  $m/z$  (EI, 70 eV) 277 (M<sup>+</sup>, 85%), 257 (M<sup>+</sup> – HF, 100), 226 (16), 171 (15), 151 (C<sub>7</sub>H<sub>5</sub>SNO<sup>+</sup>, 19) and 119 (18); HRMS (EI, M<sup>+</sup>) found: 277.0194; calcd for C<sub>13</sub>H<sub>8</sub>FSNO<sub>3</sub>: 277.0209.

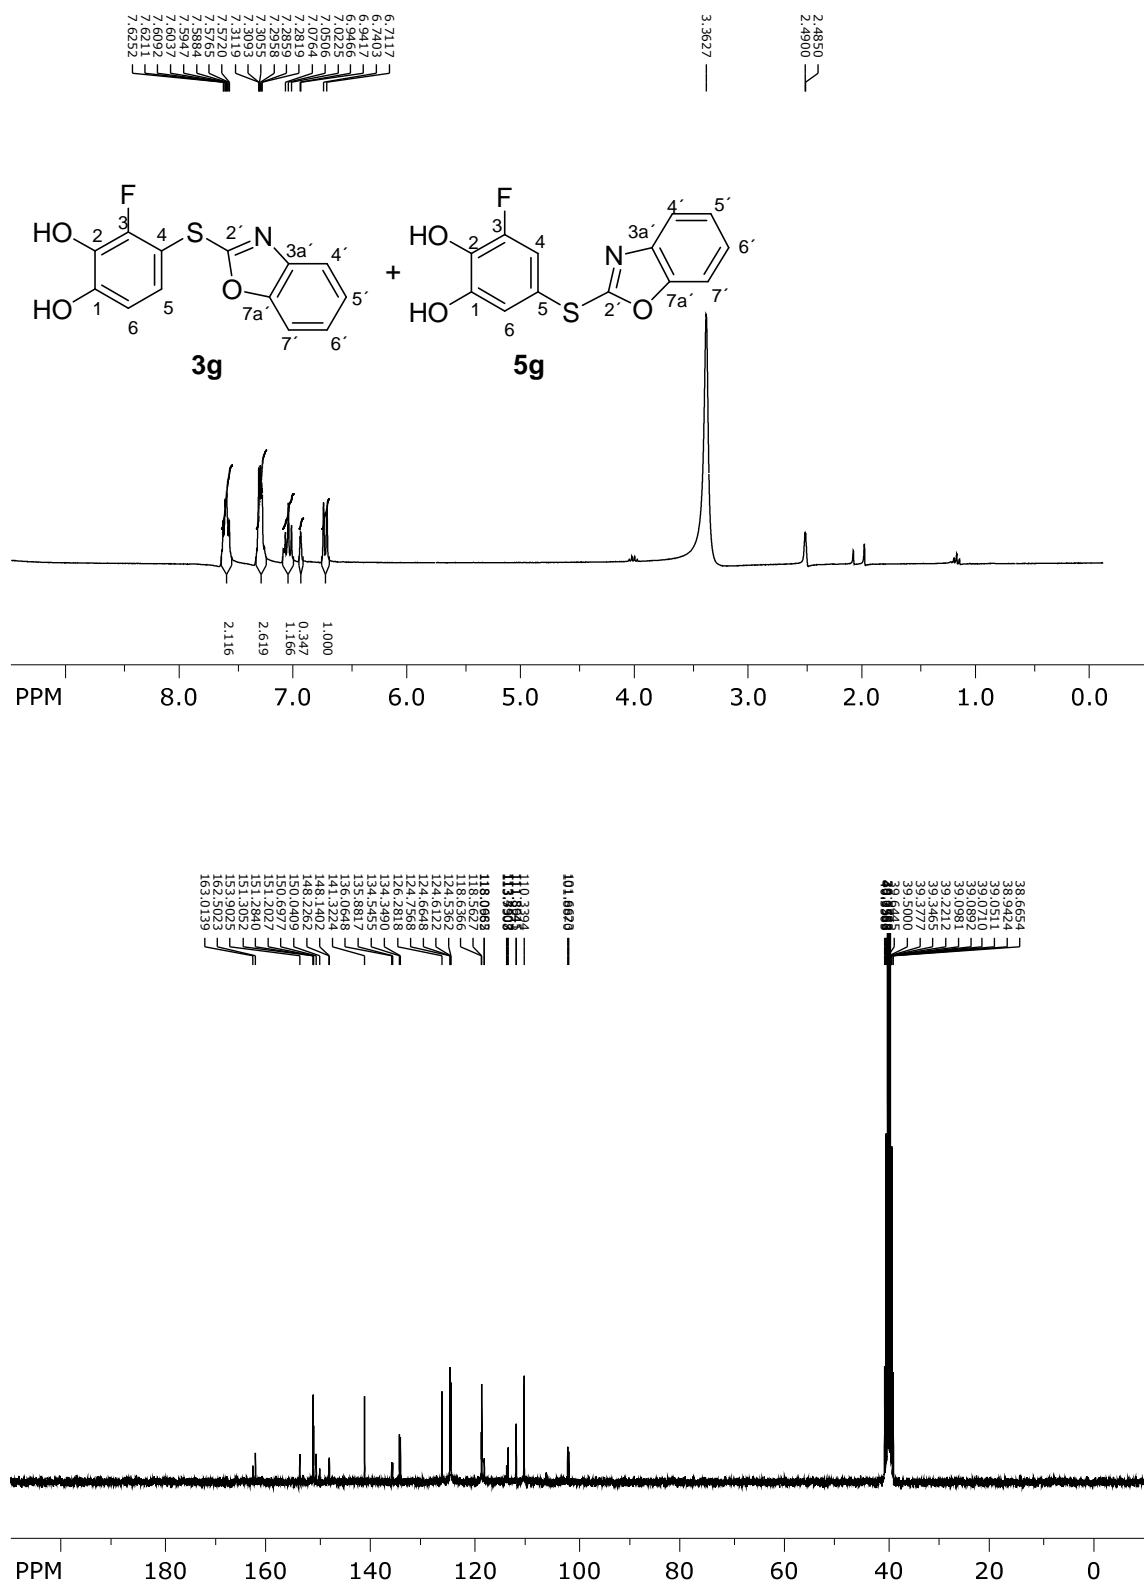

**Fig. 7** <sup>1</sup>H (300 MHz) and <sup>13</sup>C (75 MHz) NMR spectra of **3g** and **5g** in DMSO-*d*<sub>6</sub>

### 3.8. Synthesis and analytical data of 4-(benzo[*d*]thiazol-2'-ylthio)-3-fluorobenzene-1,2-diol (**3h**) and 4-(benzo[*d*]thiazol-2'-ylthio)-3-fluorobenzene-1,2-diol (**5h**)

According to the general procedure, 3-fluorocatechol (**1d**) (81 mg, 0.63 mmol), 2-mercaptobenzothiazole (**2b**) (84 mg, 0.50 mmol), methanol (3 mL), phosphate buffer (0.2 M, pH 6.0, 27 mL) and laccase (60 U, 10 mg, *A. bisporus*) were reacted for 17 h. Workup gave a mixture of 4-(benzo[*d*]thiazol-2'-ylthio)-3-fluorobenzene-1,2-diol (**3h**) and 5-(benzo[*d*]thiazol-2'-ylthio)-3-fluorobenzene-1,2-diol (**5h**) as a pale yellow solid (127 mg, 86%); mp 177–179 °C;  $R_f = 0.36$  (CH<sub>2</sub>Cl<sub>2</sub>/EtOAc = 5:1);  $\lambda_{\max}$ (MeCN)/nm 277 (log  $\epsilon$ , 4.19) and 208 (4.53);  $\tilde{\nu}_{\max}$  (atr)/cm<sup>-1</sup> 3263 (OH), 1578, 1414, 1276 and 1011;  $\delta_H$  (300 MHz; DMSO-*d*<sub>6</sub>) of **3h** 6.78 (1H, dd, <sup>3</sup> $J_{5-H,6-H}$  8.4 Hz, <sup>5</sup> $J_{6-H,F}$  1.4 Hz, 6-H), 7.11 (1H, dd, <sup>3</sup> $J_{5-H,6-H}$  8.6 Hz, <sup>4</sup> $J_{5-H,F}$  7.7 Hz, 5-H), 7.31 (1H, t like ov, <sup>3</sup> $J \sim 7.7$  Hz, 6'-H), 7.43 (1H, ddd, <sup>3</sup> $J_{4'-H,5'-H}$  7.3 or 8.4 Hz, <sup>3</sup> $J_{5'-H,6'-H}$  7.3 or 8.4 Hz, <sup>4</sup> $J_{5'-H,7'-H}$  1.4 Hz, 5'-H), 7.81 (1H, d like ov, <sup>3</sup> $J_{4'-H,5'-H}$  8.1 Hz, 4'-H), 7.90 (1H, ddd, <sup>3</sup> $J_{6'-H,7'-H}$  7.8 Hz, <sup>4</sup> $J_{5'-H,7'-H}$  1.3 or 0.7 Hz, <sup>5</sup> $J_{4'-H,7'-H}$  1.3 or 0.7 Hz, 7'-H) and 9.78 (2H, br, 1-OH and 2-OH);  $\delta_H$  (300 MHz; DMSO-*d*<sub>6</sub>) of **5h** 7.00 (1H, dd, <sup>4</sup> $J_{4-H,6-H}$  1.6 or 2.2 Hz, <sup>5</sup> $J_{6-H,F}$  1.6 or 2.2 Hz, 6-H), 7.15 (1H, dd, <sup>3</sup> $J_{4-H,F}$  10.0 Hz, <sup>4</sup> $J_{4-H,6-H}$  2.1 Hz, 4-H), 7.31 (1H, t like ov, <sup>3</sup> $J \sim 7.7$  Hz, 6'-H), 7.43 (1H, ddd, <sup>3</sup> $J_{4'-H,5'-H}$  7.3 or 8.4 Hz, <sup>3</sup> $J_{5'-H,6'-H}$  7.3 or 8.4 Hz, <sup>4</sup> $J_{5'-H,7'-H}$  1.4 Hz, 5'-H), 7.81 (1H, d like ov, <sup>3</sup> $J_{4'-H,5'-H}$  8.1 Hz, 4'-H), 7.90 (1H, ddd, <sup>3</sup> $J_{6'-H,7'-H}$  7.8 Hz, <sup>4</sup> $J_{5'-H,7'-H}$  0.7 or 1.3 Hz, <sup>5</sup> $J_{4'-H,7'-H}$  0.7 or 1.3 Hz, 7'-H) and 9.78 (2H, br, 1-OH and 2-OH);  $\delta_C$  (75 MHz; DMSO-*d*<sub>6</sub>) of **3h** 104.66 (d, <sup>2</sup> $J_{C-4,F}$  16.7 Hz, C-4), 112.31 (d, <sup>4</sup> $J_{C-6,F}$  2.5 Hz, C-6), 121.27 (C-4'), 121.73 (C-7'), 124.33 (C-6'), 126.38 (C-5'), 126.99 (br, C-5), 134.65 (d, <sup>2</sup> $J_{C-2,F}$  14.9 Hz, C-2), 134.77 (C-7a'), 151.76 (d, <sup>3</sup> $J_{C-1,F}$  6.3 Hz, C-1), 152.32 (d, <sup>1</sup> $J_{C-3,F}$  240.4 Hz, C-3), 153.65 (C-3a') and 170.10 (C-2');  $\delta_C$  (75 MHz; DMSO-*d*<sub>6</sub>) of **5h** 114.28 (d, <sup>2</sup> $J_{C-4,F}$  20.1 Hz, C-4), 116.16 (d, <sup>3</sup> $J_{C-5,F}$  10.3 Hz, C-5), 118.69 (d, <sup>4</sup> $J_{C-6,F}$  1.6 Hz, C-6), 121.27 (C-4'), 121.73 (C-7'), 124.33 (C-6'), 126.38 (C-5'), 134.77 (C-7a'), 136.68 (d, <sup>2</sup> $J_{C-2,F}$  13.8 Hz, C-2), 148.59 (d, <sup>3</sup> $J_{C-1,F}$  6.7 Hz, C-1), 151.18 (d, <sup>1</sup> $J_{C-3,F}$  240.4 Hz, C-3), 153.59 (C-3a') and 170.62 (C-2');  $m/z$  (EI, 70 eV) 293 (M<sup>+</sup>, 100%), 273 (M<sup>+</sup> – HF, 79), 260 (M<sup>+</sup> – SH, 4), 244 (8) and 167 (C<sub>7</sub>H<sub>5</sub>NS<sub>2</sub><sup>+</sup>, 10);  $m/z$  (ESI) 316 (M<sup>+</sup> + Na, 100%) and 294 (M<sup>+</sup> + 1, 30); HRMS (ESI, M<sup>+</sup> + Na) found: 315.9893; calcd for C<sub>13</sub>H<sub>8</sub>FNO<sub>2</sub>S<sub>2</sub>Na: 315.9873.



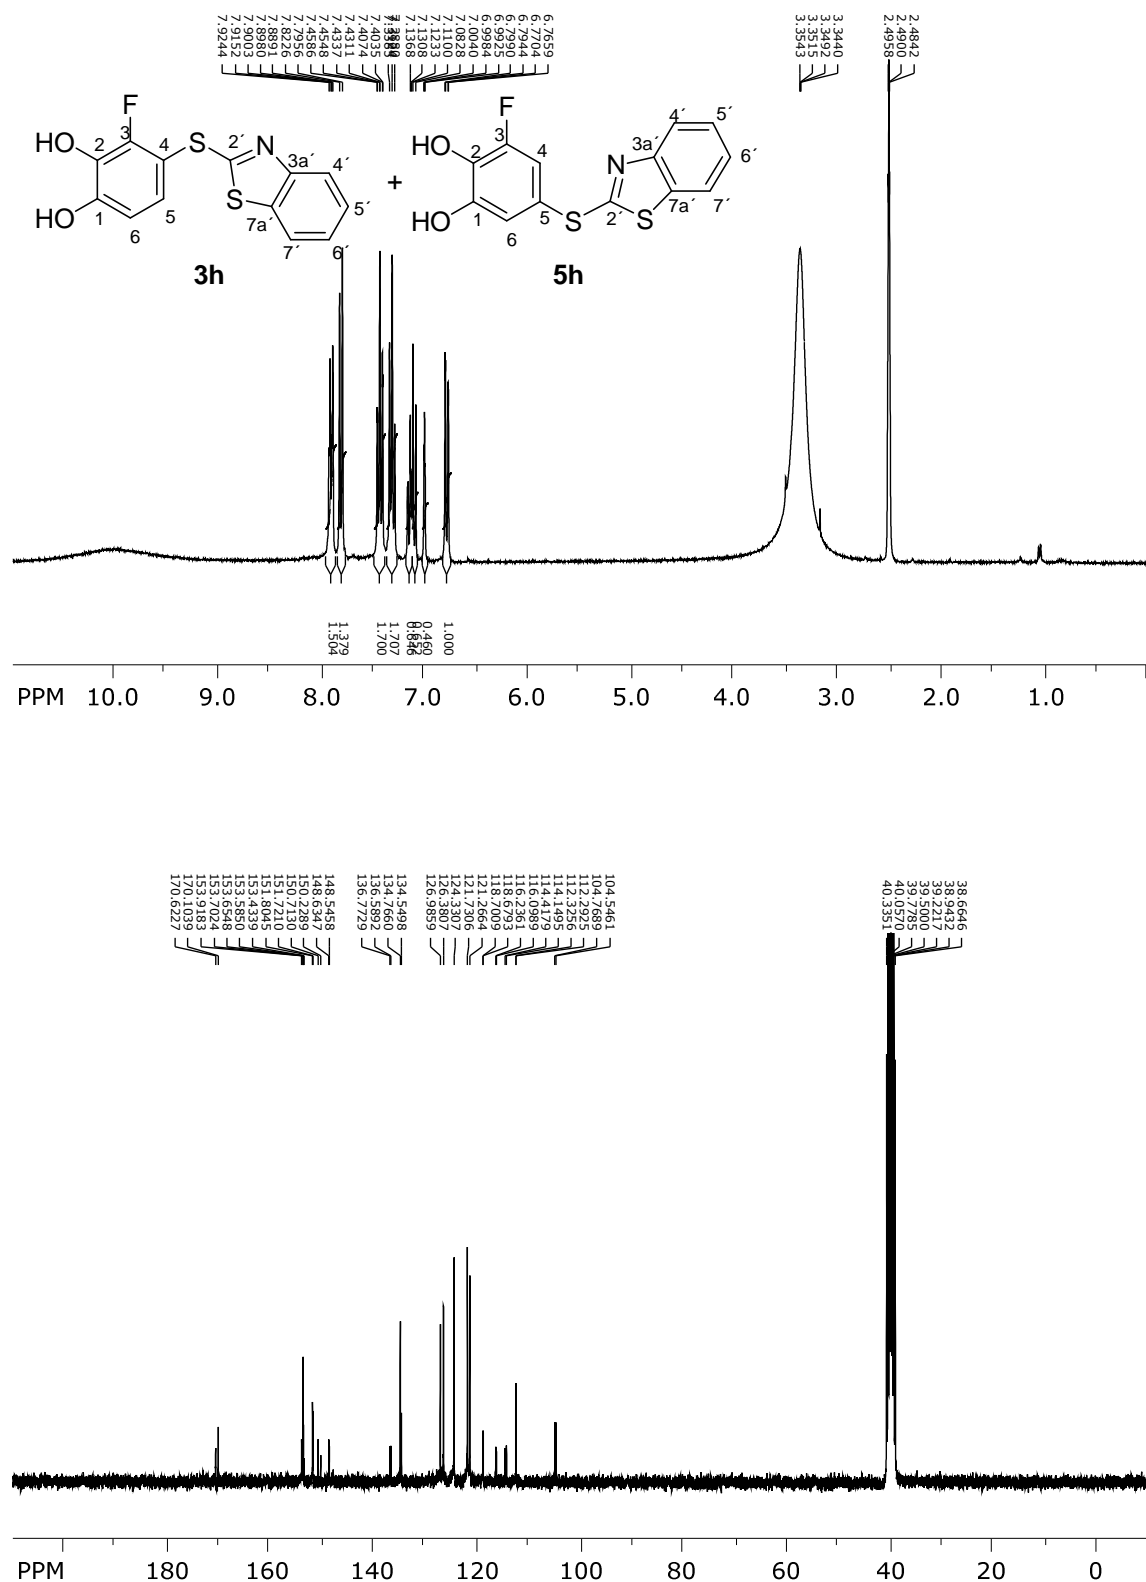

Fig. 8  $^1\text{H}$  (300 MHz) and  $^{13}\text{C}$  (75 MHz) NMR spectra of **3h** and **5h** in DMSO- $d_6$

### 3.9. Synthesis and analytical data of 4-(benzo[d]oxazol-2'-ylthio)-5-methylbenzene-1,2-diol (**6a**)

According to the general procedure, 4-methylcatechol (**1h**) (78 mg, 0.63 mmol), 2-mercaptobenzoxazole (**2a**) (76 mg, 0.50 mmol), methanol (3 mL), phosphate buffer (0.2 M, pH 6.0, 27 mL) and laccase (60 U, 10 mg, *A. bisporus*) were reacted for 17 h. Workup gave 4-(benzo[d]oxazol-2'-ylthio)-5-methylbenzene-1,2-diol (**6a**) as a pale yellow solid (117 mg, 85%); mp 198–200 °C (lit.<sup>1</sup> 198–200 °C);  $R_f = 0.53$  ( $\text{CH}_2\text{Cl}_2/\text{EtOAc} = 5:1$ );  $\lambda_{\text{max}}(\text{MeCN})/\text{nm}$  287 (log  $\epsilon$ , 4.27), 280 (4.23), 246 (4.28) and 206 (4.71);  $\tilde{\nu}_{\text{max}}(\text{atr})/\text{cm}^{-1}$  3200 (OH), 3141, 1496 1453, 1235 and 1132;  $\delta_{\text{H}}$  (300 MHz;  $\text{DMSO-}d_6$ ) 2.22 (3H, s,  $\text{CH}_3$ ), 6.80 (1H, s, 6-H), 7.04 (1H, s, 3-H), 7.25 – 7.32 (2H, m, 5'-H and 6'-H), 7.56 – 7.61 (2H, m, 4'-H and 7'-H), 9.20 (1H, s, 1-OH or 2-OH), 9.48 (1H, s, 1-OH or 2-OH);  $\delta_{\text{C}}$  (75 MHz;  $\text{DMSO-}d_6$ ) 19.66 ( $\text{CH}_3$ ), 110.23 (C-7'), 112.76 (C-4), 118.07 (C-6), 118.44 (C-4'), 123.16 (C-3), 124.31 (C-5' or C-6'), 124.59 (C-5' or C-6'), 133.58 (C-5), 141.45 (C-3a'), 143.99 (C-2), 148.17 (C-1), 151.25 (C-7a') and 163.51 (C-2');  $m/z$  (EI, 70 eV) 273 ( $\text{M}^+$ , 100%), 240 ( $\text{M}^+ - \text{SH}$ , 40), 151 ( $\text{C}_7\text{H}_5\text{NSO}^+$ , 42) and 124 ( $\text{C}_7\text{H}_8\text{O}_2^+$ , 32); HRMS (EI,  $\text{M}^+$ ) found: 273.0455; calcd for  $\text{C}_{14}\text{H}_{11}\text{NSO}_3$ : 273.0460.

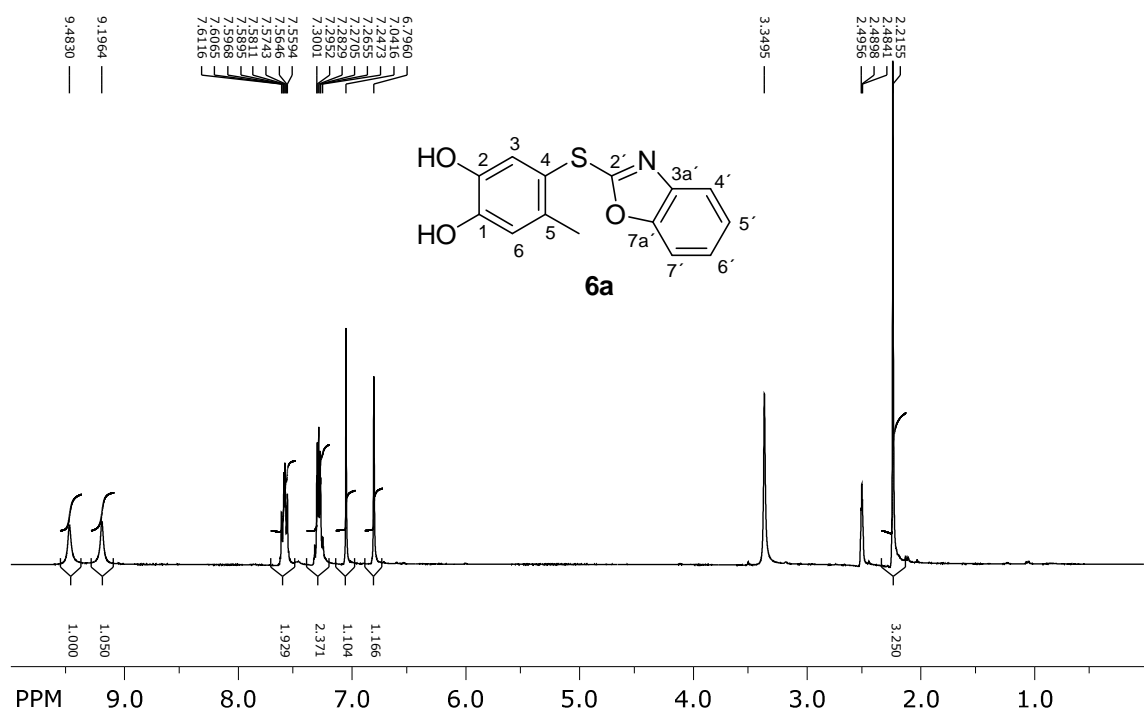

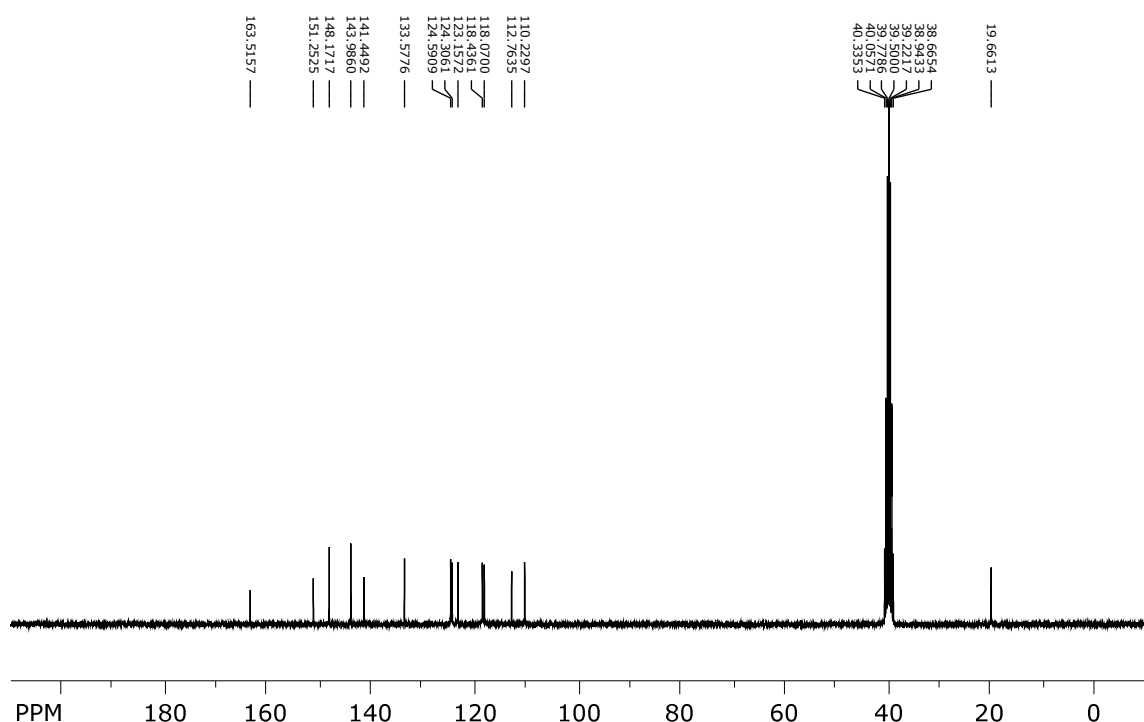

**Fig. 9**  $^1\text{H}$  (300 MHz) and  $^{13}\text{C}$  (75 MHz) NMR spectra of **6a** in  $\text{DMSO-}d_6$

### 3.10. Synthesis and analytical data of 4-(benzo[*d*]thiazol-2'-ylthio)-5-methylbenzene-1,2-diol (**6b**)

According to the general procedure, 4-methylcatechol (**1h**) (78 mg, 0.63 mmol), 2-mercaptobenzothiazole (**2b**) (84 mg, 0.50 mmol), methanol (3 mL), phosphate buffer (0.2 M, pH 6.0, 27 mL) and laccase (60 U, 10 mg, *A. bisporus*) were reacted for 17 h. Workup gave 4-(benzo[*d*]thiazol-2'-ylthio)-5-methylbenzene-1,2-diol (**6b**) as a white solid (131 mg, 90%); mp 187–189 °C;  $R_f = 0.50$  ( $\text{CH}_2\text{Cl}_2/\text{EtOAc} = 5:1$ );  $\lambda_{\text{max}}(\text{MeCN})/\text{nm}$  299 (log  $\epsilon$ , 4.15), 290 (4.21), 282 (3.19) and 210 (4.61);  $\tilde{\nu}_{\text{max}}(\text{atr})/\text{cm}^{-1}$  3248 (OH), 3054 (C-H), 1493, 1416, 1278 and 1029;  $\delta_{\text{H}}$  (300 MHz;  $\text{DMSO-}d_6$ ) 2.25 (3H, s,  $\text{CH}_3$ ), 6.85 (1H, s, 6-H), 7.08 (1H, s, 3-H), 7.26 (1H, ddd,  $^3J_{5'-\text{H},6'-\text{H}}$  7.3 or 8.1 Hz,  $^3J_{6'-\text{H},7'-\text{H}}$  7.3 or 8.1 Hz,  $^4J_{4'-\text{H},6'-\text{H}}$  1.2 Hz, 6'-H), 7.42 (1H, ddd,  $^3J_{4'-\text{H},5'-\text{H}}$  7.3 or 8.4 Hz,  $^3J_{5'-\text{H},6'-\text{H}}$  7.3 or 8.4 Hz,  $^4J_{5'-\text{H},7'-\text{H}}$  1.3 Hz, 5'-H), 7.78 (1H, ddd,  $^3J_{4'-\text{H},5'-\text{H}}$  8.1 Hz,  $^4J_{4'-\text{H},6'-\text{H}}$  1.1 or 0.6 Hz,  $^5J_{4'-\text{H},7'-\text{H}}$  1.1 or 0.6 Hz, 4'-H), 7.87 (1H, ddd,  $^3J_{6'-\text{H},7'-\text{H}}$  7.9 Hz,  $^4J_{5'-\text{H},7'-\text{H}}$  1.3 or 0.7 Hz,  $^5J_{4'-\text{H},7'-\text{H}}$  1.3 or 0.7 Hz, 7'-H) and 9.55 (2H, br, 1-OH and 2-OH);  $\delta_{\text{C}}$  (75 MHz;  $\text{DMSO-}d_6$ ) 19.52 ( $\text{CH}_3$ ), 115.87 (C-4), 118.39 (C-6), 121.08 (C-4'), 121.64 (C-7'), 123.47 (C-3), 124.04 (C-6'), 126.24 (C-5'), 133.99 (C-5), 134.79 (C-7a'), 144.52 (C-2), 148.88 (C-1), 153.91 (C-3a') and 171.75 (C-2');  $m/z$  (EI, 70 eV) 289 ( $\text{M}^+$ ,

57%), 256 ( $M^+ - SH$ , 100), 210 (34), 167 ( $C_7H_5NS_2^+$ , 34) and 123 (34); HRMS (EI,  $M^+$ )  
found: 289.0237; calcd for  $C_{14}H_{11}NO_2S_2$ : 289.0231.

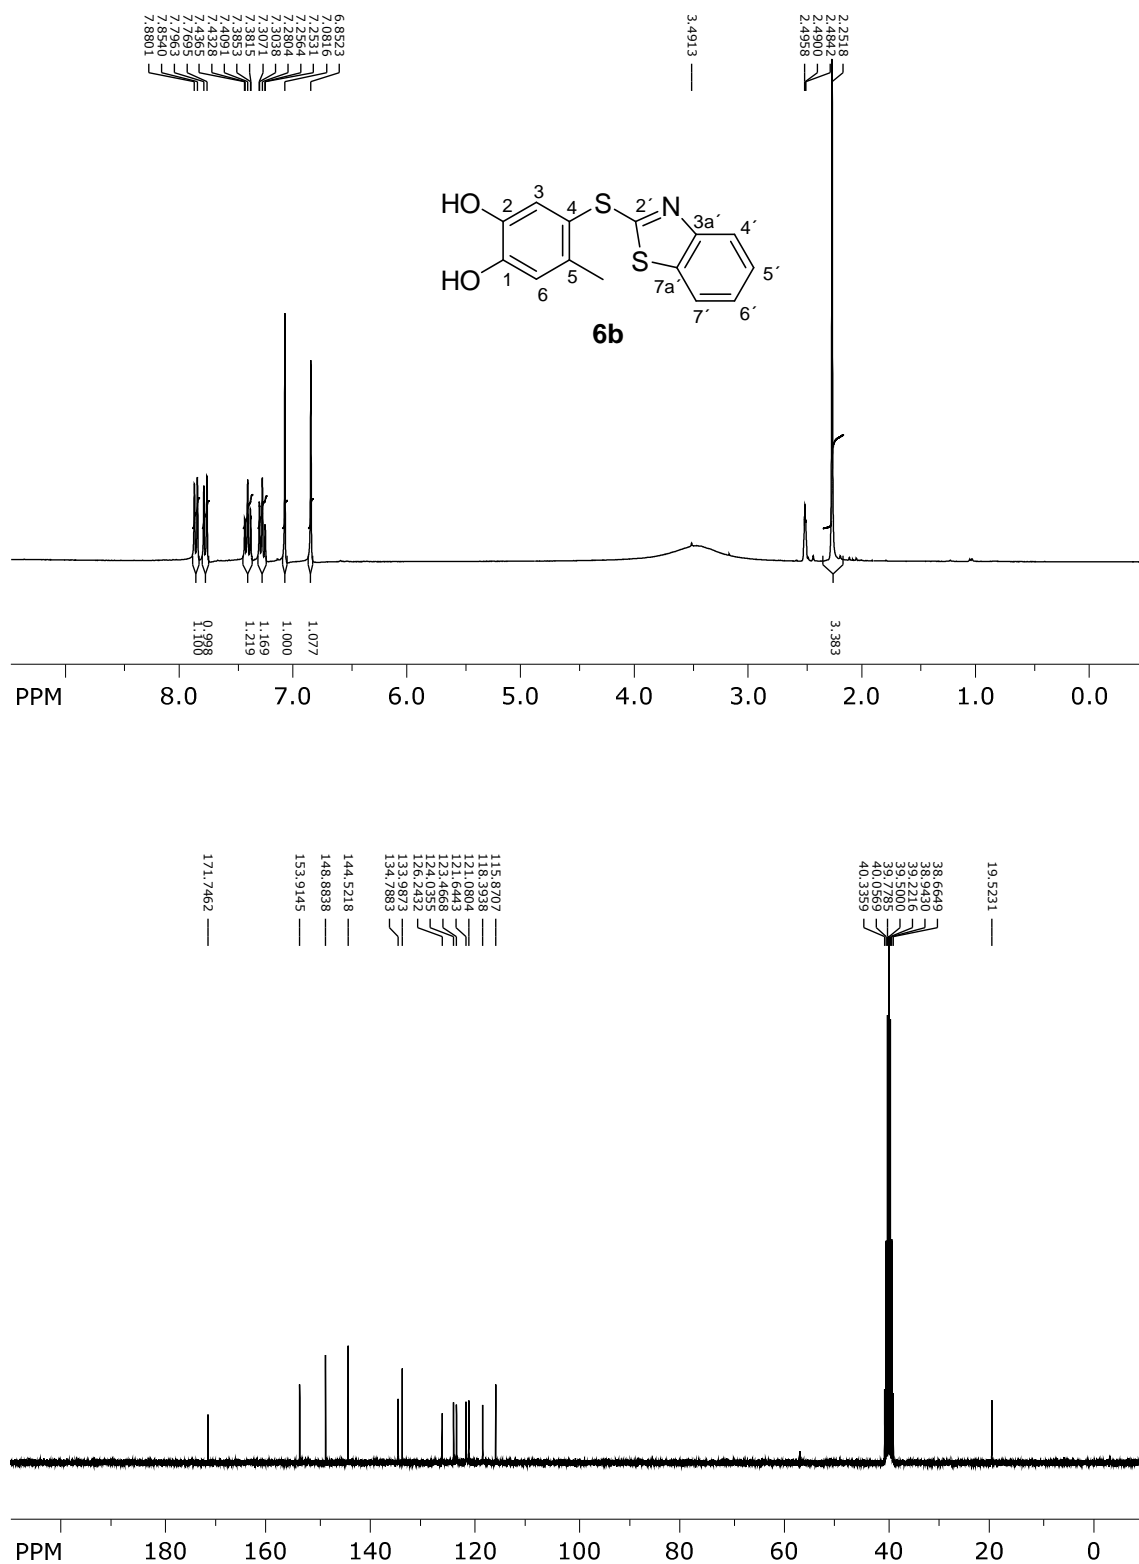

**Fig. 10**  $^1H$  (300 MHz) and  $^{13}C$  (75 MHz) NMR spectra of **6b** in  $DMSO-d_6$

### 3.11. Synthesis and analytical data of 4-(benzo[d]oxazol-2'-ylthio)-5-ethylbenzene-1,2-diol (**6c**)

According to the general procedure, 4-ethylcatechol (**1i**) (87 mg, 0.63 mmol), 2-mercaptobenzoxazole (**2a**) (76 mg, 0.50 mmol), methanol (3 mL), phosphate buffer (0.2 M, pH 6.0, 27 mL) and laccase (60 U, 10 mg, *A. bisporus*) were reacted for 17 h. Workup gave 4-(benzo[d]oxazol-2'-ylthio)-5-ethylbenzene-1,2-diol (**6c**) as a pale yellow solid (120 mg, 83%); mp 141–143 °C;  $R_f = 0.50$  ( $\text{CH}_2\text{Cl}_2/\text{EtOAc} = 5:1$ );  $\lambda_{\text{max}}(\text{MeCN})/\text{nm}$  287 (log  $\epsilon$ , 4.19), 248 (4.13) and 206 (4.55);  $\tilde{\nu}_{\text{max}}(\text{atr})/\text{cm}^{-1}$  3233 (OH), 1502, 1453 and 1133;  $\delta_{\text{H}}$  (300 MHz;  $\text{DMSO-}d_6$ ) 1.04 (3H, t,  $^3J_{1''\text{-H},2''\text{-H}} 7.5$  Hz, 2''-H), 2.61 (2H, q,  $^3J_{1''\text{-H},2''\text{-H}} 7.5$  Hz, 1''-H), 6.80 (1H, s, 6-H), 7.04 (1H, s, 3-H), 7.24 – 7.30 (2H, m, 5'-H and 6'-H), 7.56 – 7.61 (2H, m, 4'-H and 7'-H), 9.44 (1H, s, 1-OH or 2-OH) and 9.59 (1H, s, 1-OH or 2-OH);  $\delta_{\text{C}}$  (75 MHz;  $\text{DMSO-}d_6$ ) 15.44 (C-2''), 26.27 (C-1''), 110.23 (C-7'), 112.10 (C-4), 116.56 (C-6), 118.47 (C-4'), 123.47 (C-3), 124.34 (C-5' or C-6'), 124.61 (C-5' or C-6'), 139.50 (C-5), 141.47 (C-3a'), 144.09 (C-2), 148.43 (C-1), 151.24 (C-7a') and 163.84 (C-2');  $m/z$  (EI, 70 eV) 287 ( $\text{M}^+$ , 100%), 254 ( $\text{M}^+ - \text{SH}$ , 30), 180 (58), 151 ( $\text{C}_7\text{H}_5\text{NSO}^+$ , 80) and 123 (44); HRMS (EI,  $\text{M}^+$ ) found: 287.0618; calcd for  $\text{C}_{15}\text{H}_{13}\text{NSO}_3$ : 287.0616.

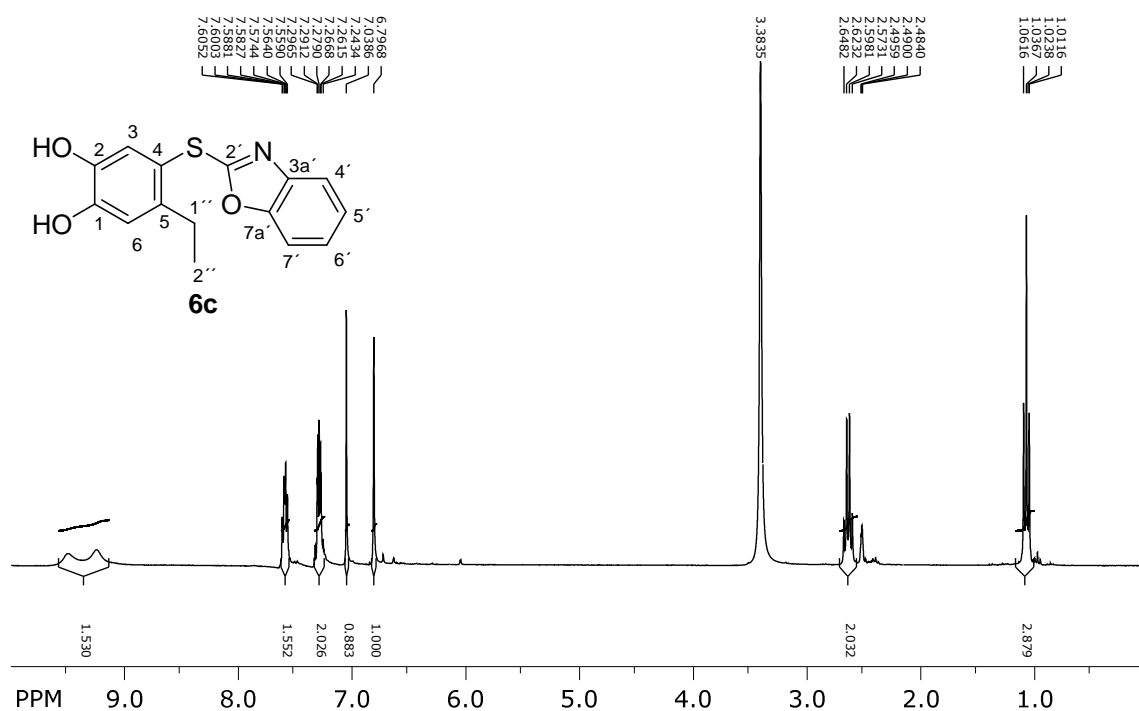

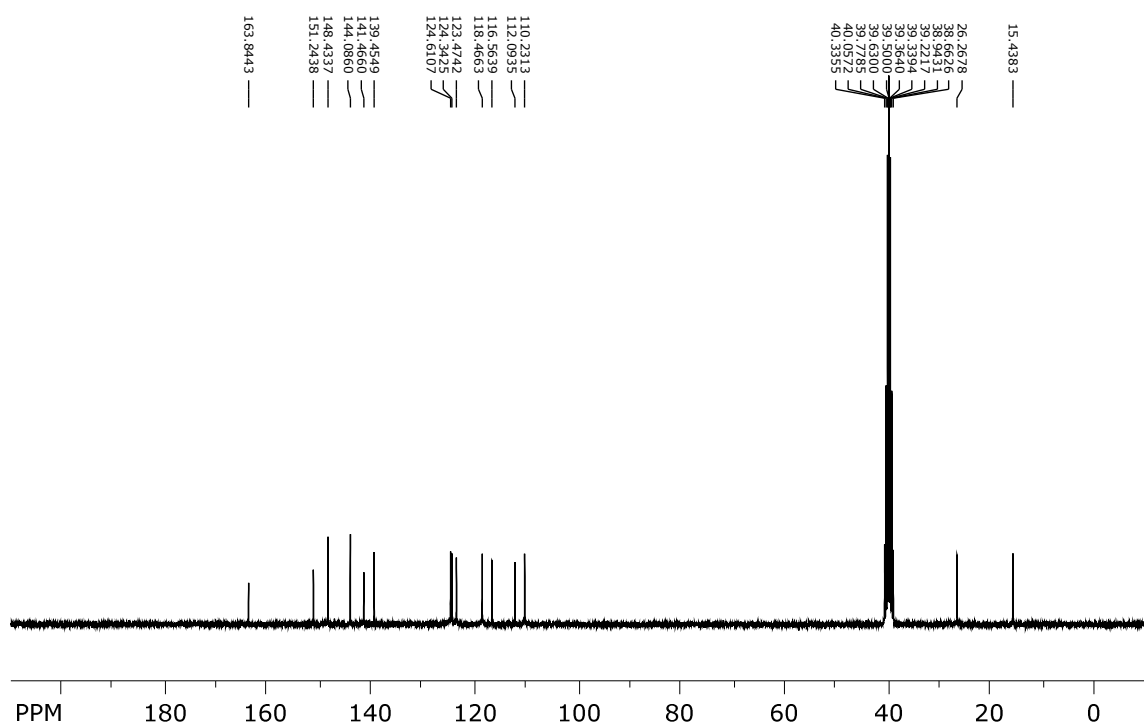

**Fig. 11**  $^1\text{H}$  (300 MHz) and  $^{13}\text{C}$  (75 MHz) NMR spectra of **6c** in  $\text{DMSO-}d_6$

### 3.12. Synthesis and analytical data of 4-(benzo[*d*]thiazol-2'-ylthio)-5-ethylbenzene-1,2-diol (**6d**)

According to the general procedure, 4-ethylcatechol (**1i**) (87 mg, 0.63 mmol), 2-mercaptobenzothiazole (**2b**) (84 mg, 0.50 mmol), methanol (3 mL), phosphate buffer (0.2 M, pH 6.0, 27 mL) and laccase (60 U, 10 mg, *A. bisporus*) were reacted for 17 h. Workup gave 4-(benzo[*d*]thiazol-2'-ylthio)-5-ethylbenzene-1,2-diol (**6d**) as a pale yellow solid (126 mg, 83%); mp 152–154 °C;  $R_f = 0.54$  ( $\text{CH}_2\text{Cl}_2/\text{EtOAc} = 5:1$ );  $\lambda_{\text{max}}(\text{MeCN})/\text{nm}$  290 (log  $\epsilon$ , 4.24), 282 (4.24) and 211 (4.63);  $\tilde{\nu}_{\text{max}}(\text{atr})/\text{cm}^{-1}$  3275 (OH), 3054 (C-H), 1498, 1416, 1266 and 1029;  $\delta_{\text{H}}$  (300 MHz;  $\text{DMSO-}d_6$ ) 1.07 (3H, t,  $^3J_{1''\text{-H},2''\text{-H}}$  7.2 Hz, 2''-H), 2.63 (2H, q,  $^3J_{1''\text{-H},2''\text{-H}}$  7.2 Hz, 1''-H), 6.85 (1H, s, 6-H), 7.07 (1H, s, 3-H), 7.28 (1H, ddd,  $^3J_{5'\text{-H},6'\text{-H}}$  7.2 or 8.0 Hz,  $^3J_{6'\text{-H},7'\text{-H}}$  7.2 or 8.0 Hz,  $^4J_{4'\text{-H},6'\text{-H}}$  1.1 Hz, 6'-H), 7.41 (1H, ddd,  $^3J_{4'\text{-H},5'\text{-H}}$  7.2 or 8.0 Hz,  $^3J_{5'\text{-H},6'\text{-H}}$  7.2 or 8.0 Hz,  $^4J_{5'\text{-H},7'\text{-H}}$  1.2 Hz, 5'-H), 7.78 (1H, ddd,  $^3J_{4'\text{-H},5'\text{-H}}$  8.1 Hz,  $^4J_{4'\text{-H},6'\text{-H}}$  1.2 or 0.5 Hz,  $^5J_{4'\text{-H},7'\text{-H}}$  1.2 or 0.5 Hz, 4'-H), 7.87 (1H, ddd,  $^3J_{6'\text{-H},7'\text{-H}}$  8.0 Hz,  $^4J_{5'\text{-H},7'\text{-H}}$  1.3 or 0.6 Hz,  $^5J_{4'\text{-H},7'\text{-H}}$  1.3 or 0.6 Hz, 7'-H) and 9.51 (2H, br, 1-OH and 2-OH);  $\delta_{\text{C}}$  (75 MHz;  $\text{DMSO-}d_6$ ) 15.66 (C-2''), 26.23 (C-1''), 115.18 (C-4), 116.86 (C-6), 121.06 (C-4'), 121.63 (C-7'), 123.67 (C-3), 124.02 (C-6'), 126.23 (C-5'), 134.76 (C-7a'), 139.84 (C-5), 144.55 (C-2), 149.05 (C-1),

153.83 (C-3a') and 172.15 (C-2');  $m/z$  (EI, 70 eV) 303 ( $M^+$ , 60%), 270 ( $M^+ - SH$ , 100), 255 (25), 167 ( $C_7H_5NS_2^+$ , 42) and 123 (36); HRMS (EI,  $M^+$ ) found: 303.0381; calcd for  $C_{15}H_{13}NO_2S_2$ : 303.0388.

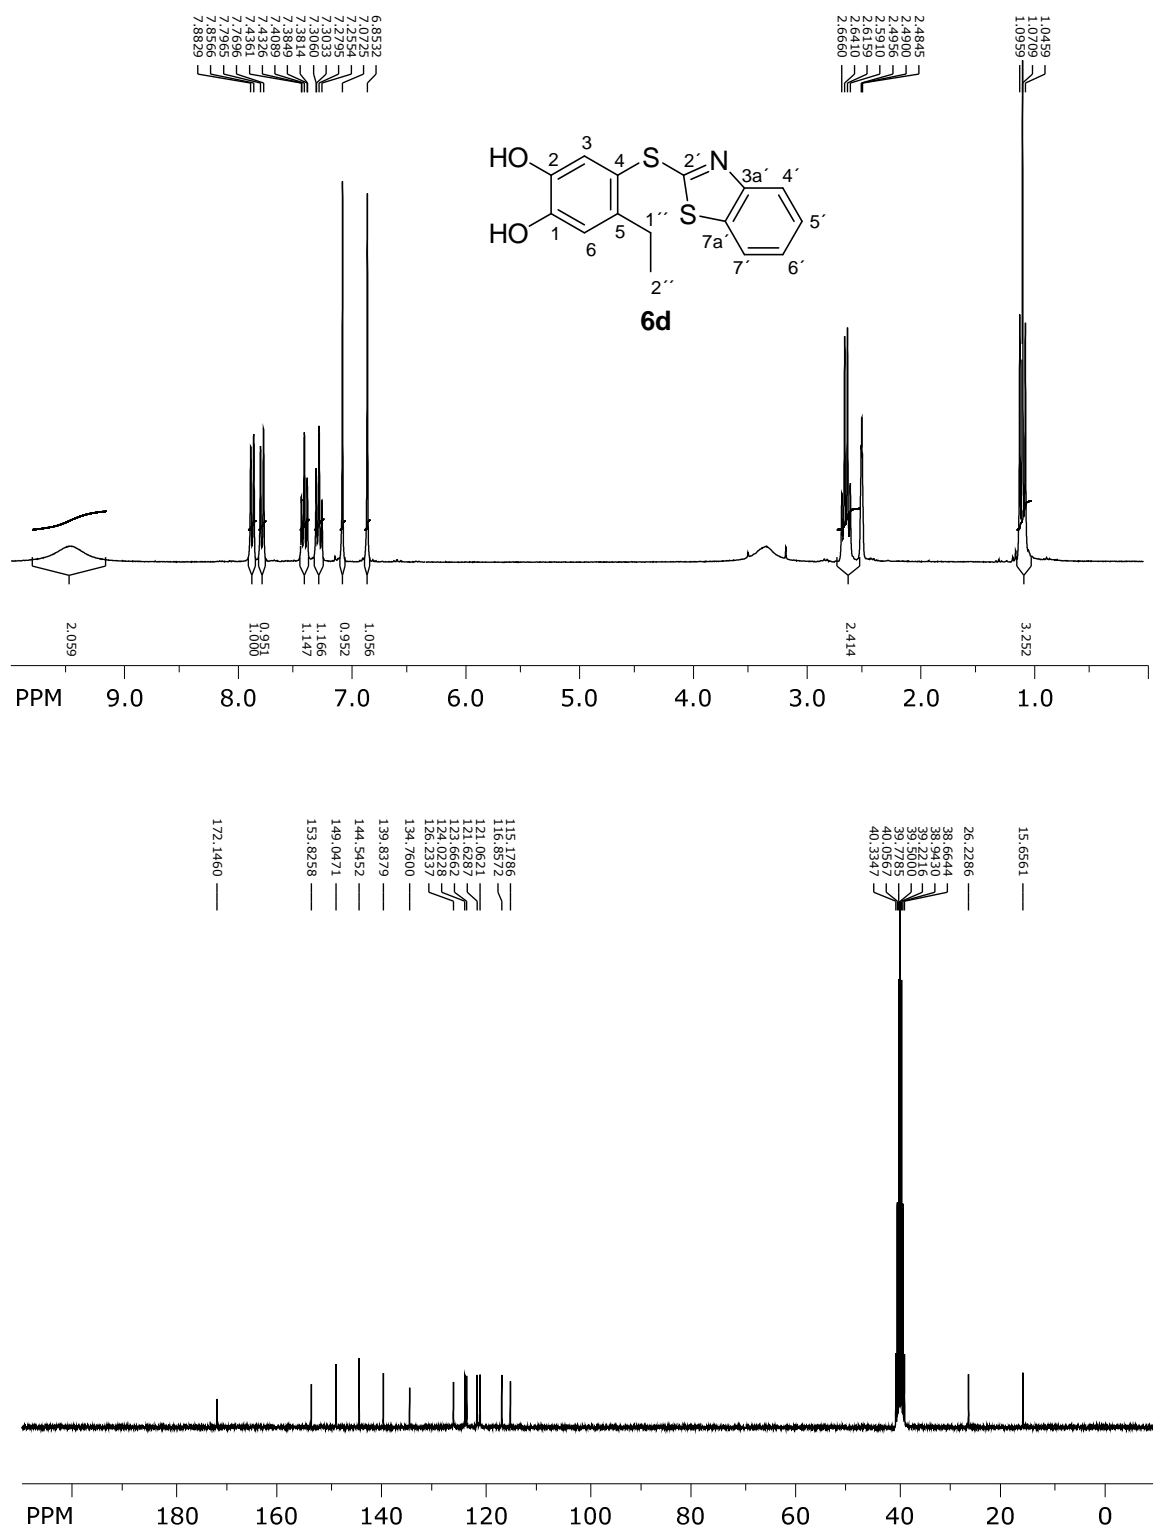

Fig. 12  $^1H$  (300 MHz) and  $^{13}C$  (75 MHz) NMR spectra of **6d** in  $DMSO-d_6$

### 3.13. Synthesis and analytical data of 3-(benzo[d]oxazol-2'-ylthio)-4-nitrobenzene-1,2-diol (**7a**)

According to the general procedure, 4-nitrocatechol (**1j**) (78 mg, 0.50 mmol), 2-mercaptobenzoxazole (**2a**) (76 mg, 0.50 mmol), methanol (3 mL), phosphate buffer (0.2 M, pH 6.0, 27 mL) and laccase (60 U, 10 mg, *A. bisporus*) were reacted for 17 h. Column filtration (EtOAc/MeOH 1:2) gave 3-(benzo[d]oxazol-2'-ylthio)-4-nitrobenzene-1,2-diol (**7a**) as a yellow solid (130 mg, 85%); mp 223–225 °C;  $R_f = 0.22$  (EtOAc/MeOH = 5:1);  $\lambda_{\max}(\text{MeCN})/\text{nm}$  314 (log  $\epsilon$ , 4.18) and 202 (4.61);  $\tilde{\nu}_{\max}(\text{atr})/\text{cm}^{-1}$  3327 (OH), 1587, 1303 and 1207;  $\delta_{\text{H}}$  (300 MHz; DMSO- $d_6$ ) 6.84 (1H, t like,  $^3J_{5\text{-H},6\text{'-H}}$  7.1 Hz, 5'-H), 6.93 (2H, d like ov,  $^3J \sim 7.5$  Hz, 4'-H and 7'-H), 7.00 (1H, d,  $^3J_{5\text{-H},6\text{-H}}$  9.2 Hz, 6-H), 7.03 (1H, t like ov, 6'-H), 8.06 (1H, d,  $^3J_{5\text{-H},6\text{-H}}$  9.3 Hz, 5-H) and 9.35 (2H, br, 1-OH and 2-OH);  $\delta_{\text{C}}$  (75 MHz; DMSO- $d_6$ ) 115.11 (C-6), 116.75 (C-7'), 119.84 (C-5'), 121.26 (C-4'), 122.28 (C-5), 123.17 (C-3), 126.11 (C-6'), 133.04 (C-4), 134.70 (C-3a'), 138.17 (C-2), 148.16 (C-7a'), 148.39 (C-1) and 159.83 (C-2');  $m/z$  (EI, 70 eV) 304 ( $\text{M}^+$ , 100%), 258 ( $\text{M}^+ - \text{NO}_2$ , 5), 169 (78), 135 (38) and 80 (15); HRMS (EI,  $\text{M}^+$ ) found: 304.0154; calcd for  $\text{C}_{13}\text{H}_8\text{N}_2\text{O}_5\text{S}$ : 304.0154.

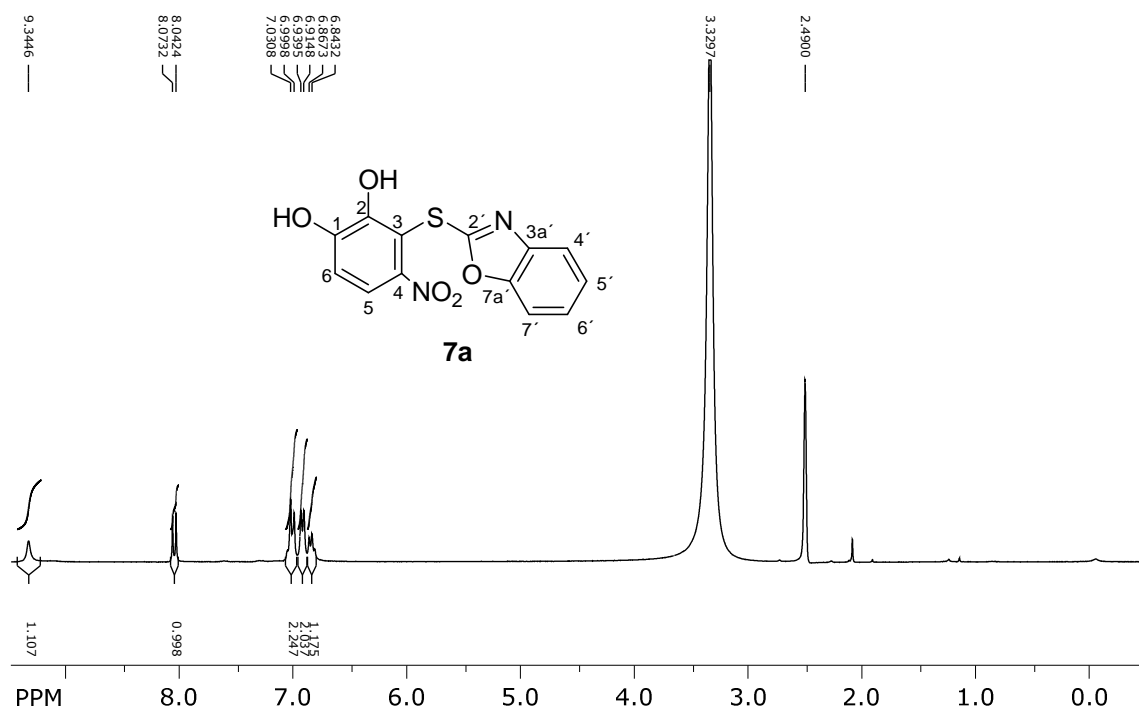



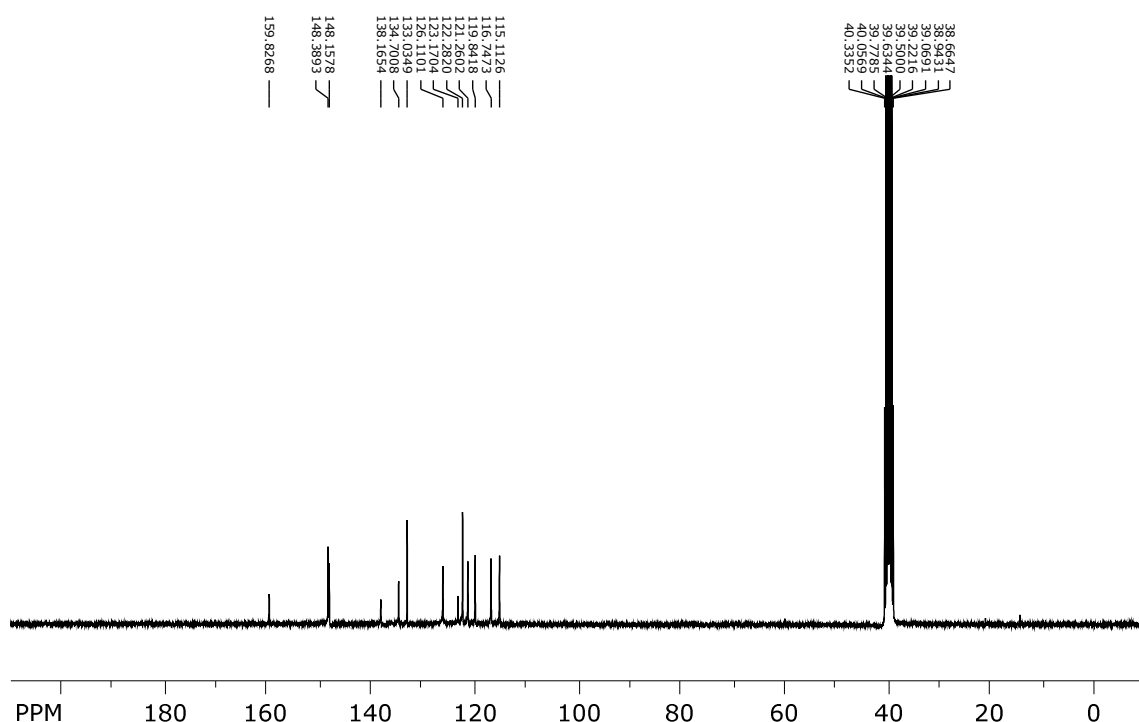

**Fig. 13**  $^1\text{H}$  (300 MHz) and  $^{13}\text{C}$  (75 MHz) NMR spectra of **7a** in  $\text{DMSO-}d_6$

### 3.14. Synthesis and analytical data of 4-(4',5'-dihydrothiazol-2'-ylthio)benzene-1,2-diol (**8a**)

According to the general procedure, catechol (**1a**) (69 mg, 0.63 mmol), 2-mercaptothiazoline (**2c**) (60 mg, 0.50 mmol), methanol (3 mL), phosphate buffer (0.2 M, pH 6.0, 27 mL) and laccase (60 U, 10 mg, *A. bisporus*) were reacted for 20 h. Workup gave 4-(4',5'-dihydrothiazol-2'-ylthio)benzene-1,2-diol (**8a**) as a pale yellow solid (95 mg, 83%); mp 165–167 °C (lit.<sup>2</sup> > 250 °C);  $R_f = 0.27$  ( $\text{CH}_2\text{Cl}_2/\text{EtOAc} = 5:1$ );  $\lambda_{\text{max}}(\text{MeCN})/\text{nm}$  286 (log  $\epsilon$ , 3.23) and 206 (4.14);  $\tilde{\nu}_{\text{max}}(\text{atr})/\text{cm}^{-1}$  3316 (OH), 1546, 1506, 1401, 1251 and 1029;  $\delta_{\text{H}}$  (300 MHz;  $\text{DMSO-}d_6$ ) 3.26 (2H, t,  $^3J_{4'-\text{H},5'-\text{H}}$  8.2 Hz, 5'-H), 4.16 (2H, t,  $^3J_{4'-\text{H},5'-\text{H}}$  8.2 Hz, 4'-H), 6.76 (1H, d,  $^3J_{5-\text{H},6-\text{H}}$  7.2 Hz, 6-H), 6.87 (1H, dd,  $^3J_{5-\text{H},6-\text{H}}$  8.0 Hz,  $^4J_{3-\text{H},5-\text{H}}$  2.1 Hz, 5-H), 6.90 (1H, d,  $^4J_{3-\text{H},5-\text{H}}$  2.1 Hz, 3-H) and 9.44 (2H, br, 1-OH and 2-OH);  $\delta_{\text{C}}$  (75 MHz;  $\text{DMSO-}d_6$ ) 34.00 (C-5'), 65.46 (C-4'), 116.08 (C-6), 117.07 (C-4), 122.61 (C-3) 127.37 (C-5), 145.61 (C-2), 147.87 (C-1) and 167.12 (C-2');  $m/z$  (EI, 70 eV) 227 ( $\text{M}^+$ , 74%), 226 ( $\text{M}^+ - 1$ , 100), 167 ( $\text{M}^+ - \text{C}_2\text{H}_4\text{S}$ , 47) and 141 (16); HRMS (EI,  $\text{M}^+$ ) found: 227.0090; calcd for  $\text{C}_9\text{H}_9\text{NO}_2\text{S}_2$ : 227.0075.

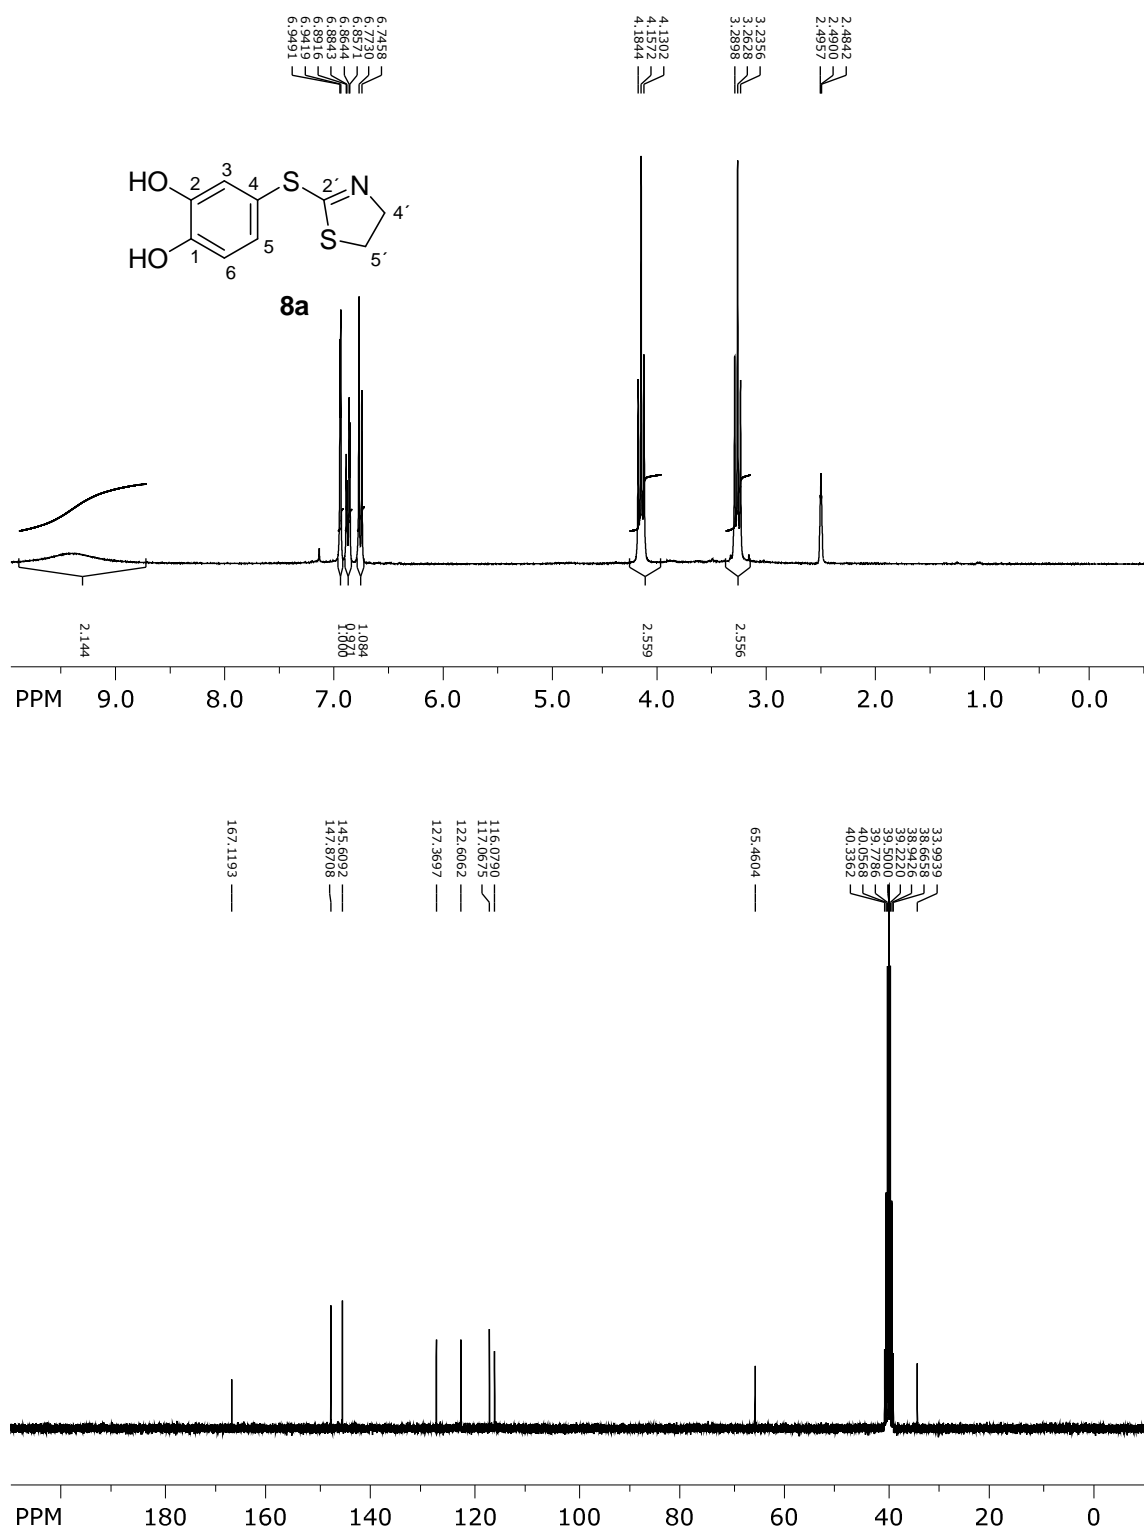

**Fig. 14** <sup>1</sup>H (300 MHz) and <sup>13</sup>C (75 MHz) NMR spectra of **8a** in DMSO-*d*<sub>6</sub>

### 3.15. Synthesis and analytical data of 4-(4',5'-dihydrothiazol-2'-ylthio)-5-methylbenzene-1,2-diol (**8b**)

According to the general procedure, 4-methylcatechol (**1h**) (78 mg, 0.63 mmol), 2-mercaptothiazoline (**2c**) (60 mg, 0.50 mmol), methanol (3 mL), phosphate buffer (0.2 M, pH 6.0, 27 mL) and laccase (60 U, 10 mg, *A. bisporus*) were reacted for 17 h. Workup gave 4-(4',5'-dihydrothiazol-2'-ylthio)-5-methylbenzene-1,2-diol (**8b**) as a white solid (90 mg, 74%); mp 192–194 °C (lit.<sup>2</sup> 179–180 °C);  $R_f = 0.25$  ( $\text{CH}_2\text{Cl}_2/\text{EtOAc} = 5:1$ );  $\lambda_{\text{max}}(\text{MeCN})/\text{nm}$  291 (log  $\epsilon$ , 3.68) and 209 (4.59);  $\tilde{\nu}_{\text{max}}(\text{atr})/\text{cm}^{-1}$  3270 (OH), 1562, 1426, 1401, 1288 and 1002;  $\delta_{\text{H}}$  (300 MHz;  $\text{DMSO-}d_6$ ) 2.21 (3H, s,  $\text{CH}_3$ ), 3.26 (2H, t,  $^3J_{4'-\text{H},5'-\text{H}} 8.1$  Hz, 5'-H), 4.16 (2H, t,  $^3J_{4'-\text{H},5'-\text{H}} 8.2$  Hz, 4'-H), 6.71 (1H, s, 6-H), 6.90 (1H, s, 3-H) and 9.24 (2H, br, 1-OH and 2-OH);  $\delta_{\text{C}}$  (75 MHz;  $\text{DMSO-}d_6$ ) 19.88 ( $\text{CH}_3$ ), 33.95 (C-5'), 65.51 (C-4'), 116.37 (C-4), 117.63 (C-6), 123.49 (C-3) 133.84 (C-5), 143.45 (C-2), 148.01 (C-1) and 166.82 (C-2');  $m/z$  (EI, 70 eV) 241 ( $\text{M}^+$ , 100%), 226 ( $\text{M}^+ - \text{CH}_3$ , 36), 208 ( $\text{M}^+ - \text{SH}$ , 22), 194 (50) and 154 (32); HRMS (EI,  $\text{M}^+$ ) found: 241.0204; calcd for  $\text{C}_{10}\text{H}_{11}\text{NO}_2\text{S}_2$ : 241.0231.

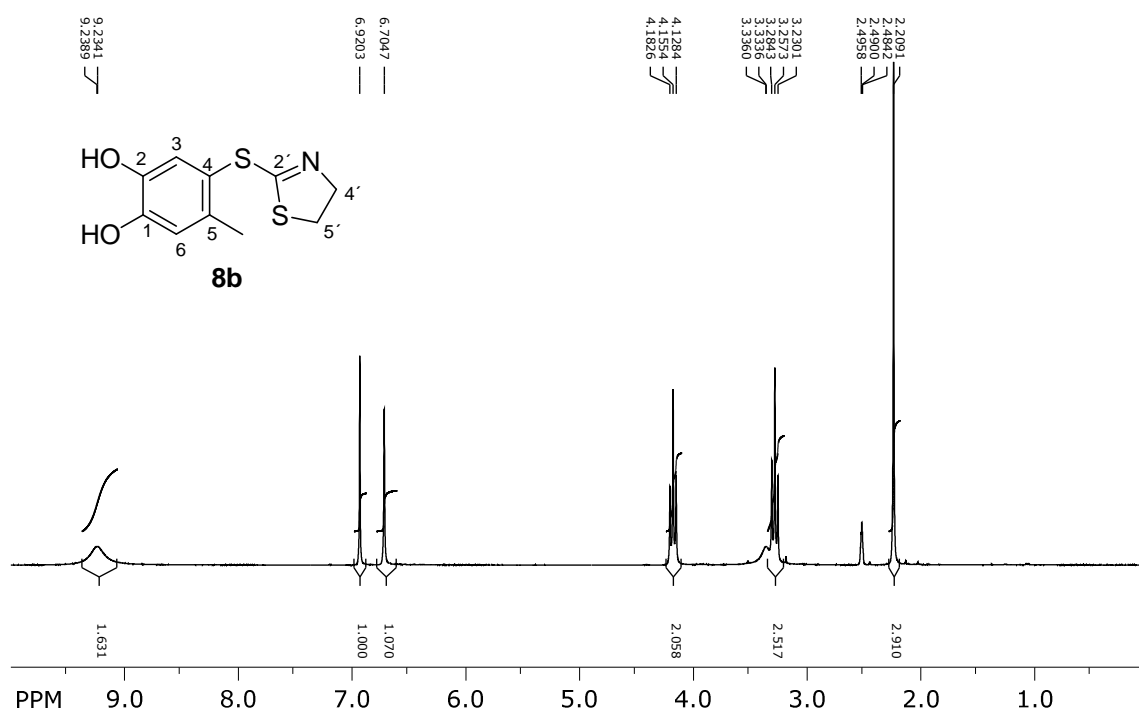

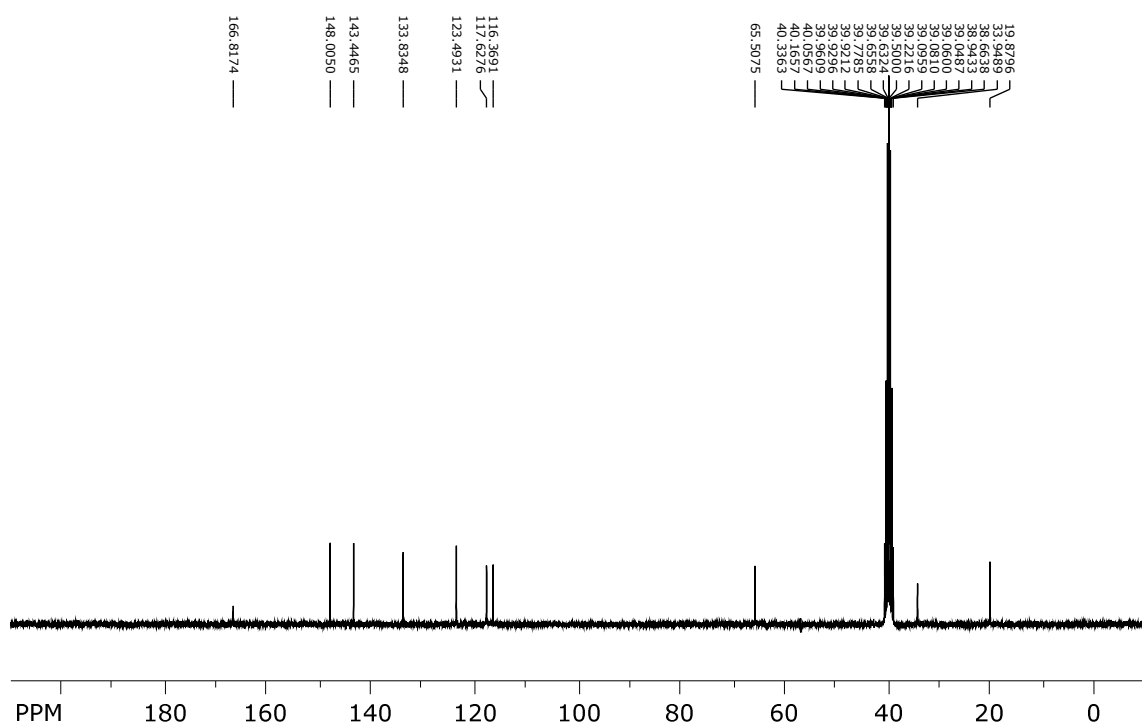

**Fig. 15**  $^1\text{H}$  (300 MHz) and  $^{13}\text{C}$  (75 MHz) NMR spectra of **8b** in  $\text{DMSO}-d_6$

### 3.16. Synthesis and analytical data of 4-(4',5'-dihydrothiazol-2'-ylthio)-5-ethylbenzene-1,2-diol (**8c**)

According to the general procedure, 4-ethylcatechol (**1i**) (87 mg, 0.63 mmol), 2-mercaptothiazoline (**2c**) (60 mg, 0.50 mmol), methanol (3 mL), phosphate buffer (0.2 M, pH 6.0, 27 mL) and laccase (60 U, 10 mg, *A. bisporus*) were reacted for 17 h. Workup gave 4-(4',5'-dihydrothiazol-2'-ylthio)-5-ethylbenzene-1,2-diol (**8c**) as a pale yellow solid (105 mg, 82%); mp 169–171 °C;  $R_f = 0.24$  ( $\text{CH}_2\text{Cl}_2/\text{EtOAc} = 5:1$ );  $\lambda_{\text{max}}(\text{MeCN})/\text{nm}$  290 (log  $\epsilon$ , 3.61) and 210 (4.53);  $\tilde{\nu}_{\text{max}}(\text{atr})/\text{cm}^{-1}$  3252 (OH), 1567, 1435, 1290 and 1003;  $\delta_{\text{H}}$  (300 MHz;  $\text{DMSO}-d_6$ ) 1.08 (3H, t,  $^3J_{1''\text{-H},2''\text{-H}}$  7.5 Hz, 2''-H), 2.60 (2H, q,  $^3J_{1''\text{-H},2''\text{-H}}$  7.5 Hz, 1''-H), 3.25 (2H, t,  $^3J_{4'\text{-H},5'\text{-H}}$  8.4 Hz, 5'-H), 4.15 (2H, t,  $^3J_{4'\text{-H},5'\text{-H}}$  8.4 Hz, 4'-H), 6.71 (1H, s, 6-H), 6.91 (1H, s, 3-H) and 9.24 (2H, br, 1-OH and 2-OH);  $\delta_{\text{C}}$  (75 MHz;  $\text{DMSO}-d_6$ ) 15.48 (C-2''), 26.31 (C-1''), 34.04 (C-5'), 65.51 (C-4'), 115.67 (C-4), 116.11 (C-6), 123.85 (C-3), 139.63 (C-5), 143.49 (C-2), 148.24 (C-1) and 167.29 (C-2');  $m/z$  (EI, 70 eV) 255 ( $\text{M}^+$ , 50%), 222 ( $\text{M}^+ - \text{SH}$ , 17), 208 (44) and 123 (100); HRMS (EI,  $\text{M}^+$ ) found: 255.0417; calcd for  $\text{C}_{11}\text{H}_{13}\text{NO}_2\text{S}_2$ : 255.0388.

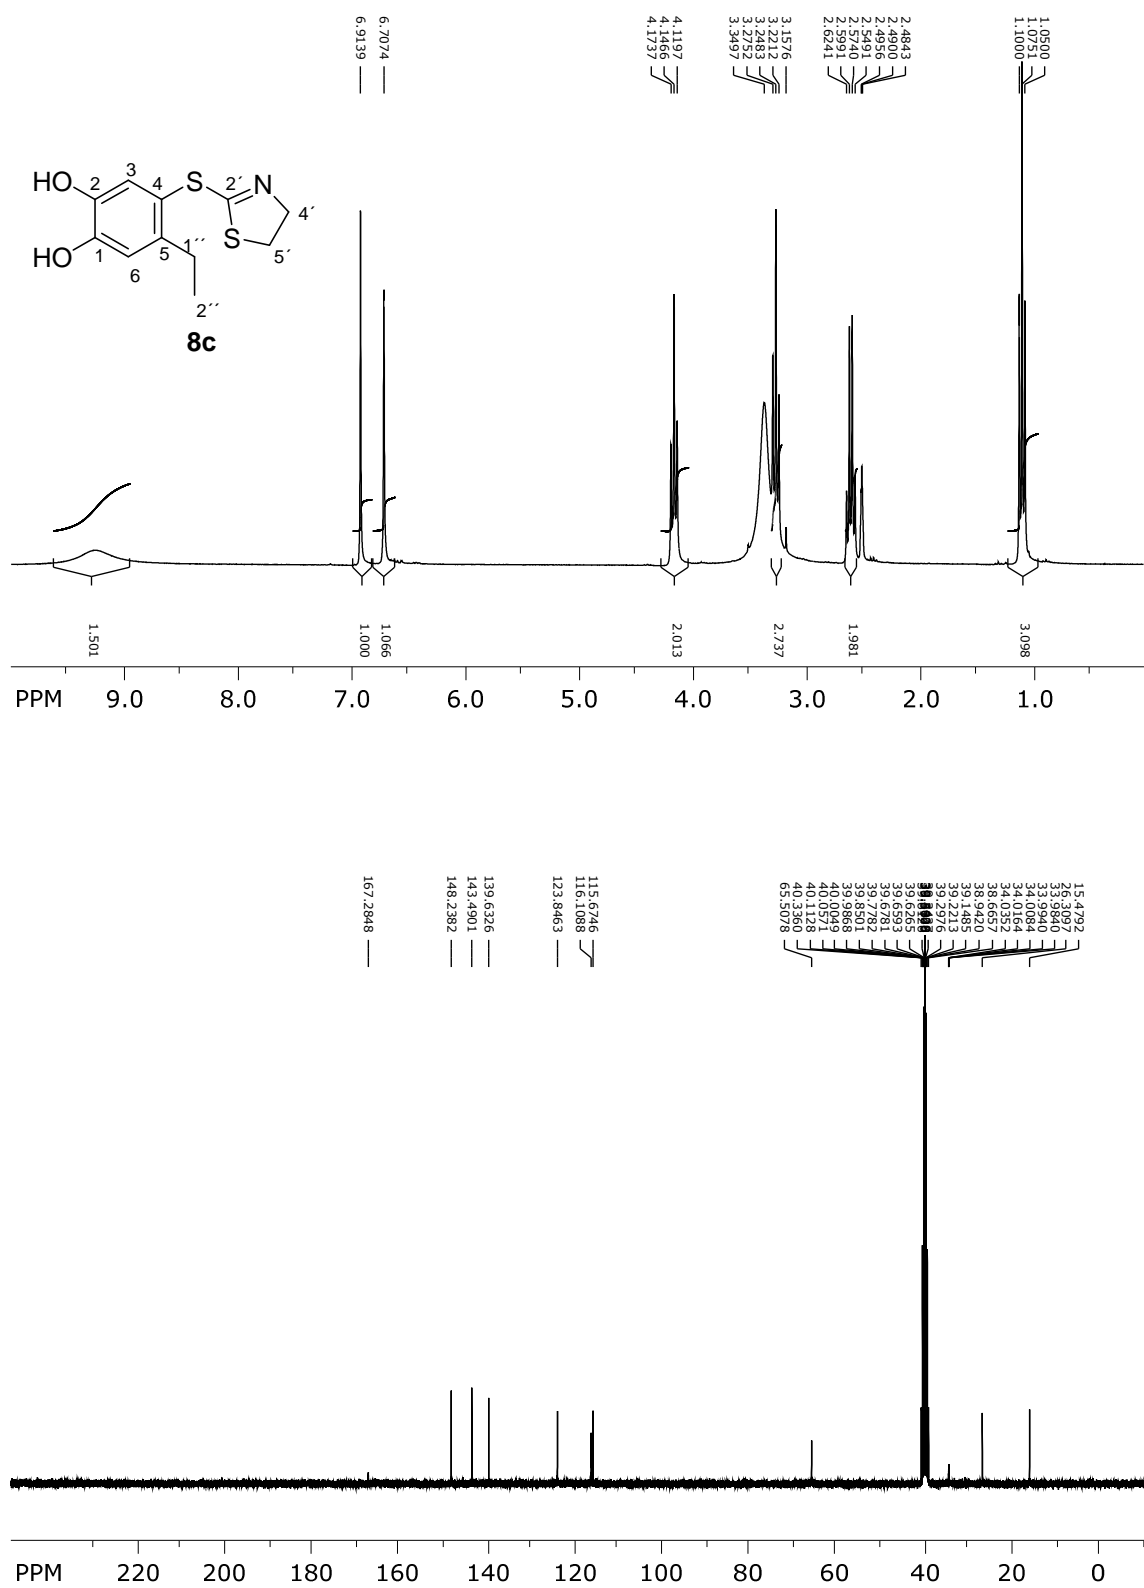

**Fig. 16** <sup>1</sup>H (300 MHz) and <sup>13</sup>C (75 MHz) NMR spectra of **8c** in DMSO-*d*<sub>6</sub>

#### 4. Computational studies of compounds **3a** and **3b**

Calculations reported in this paper were performed within Density Functional Theory, using the Gaussian 03 package.<sup>3</sup> <sup>13</sup>C NMR chemical shifts of selected compounds **3a** and **3b** were calculated as follows: the structures were optimized with the MM2 force field implemented in Chem3D Pro.<sup>4</sup> In the second step, the optimized structures were subsequently reoptimized at the AM1 level followed by the RHF/3-21G level and finally by B3LYP/6-31G(d) level of theory within the Gaussian 03 package. In the final step, the <sup>13</sup>C NMR chemical shielding of the reoptimized geometries were computed once at the mPW1PW91/6-311+G(2d,p)//mPW1PW91/6-31G(d) level of theory in the gas phase.<sup>3</sup> The references TMS and benzene for the MSTD approach according to Sarotti and Pellegrinet<sup>5</sup> were computed in the same manner as for **3a** and **3b**. For comparison with the experimental <sup>13</sup>C NMR chemical shifts the computationally derived <sup>13</sup>C NMR chemical shifts were calculated as follows:

$$\delta_a = \sigma_{\text{ref gas phase}} - \sigma_a \text{ gas phase} + \delta_{\text{ref}}$$

where  $\sigma_{\text{ref}}$  and  $\sigma_a$  are the calculated NMR isotropic magnetic shielding tensors of the reference compound and carbon a of the compound of interest:  $\sigma_{\text{TMS}} = 185.81$  ppm and  $\sigma_{\text{benzene}} = 54.41$  ppm at the mPW1PW91/6-311+G(2d,p)// mPW1PW91/6-31G(d) level gas phase;  $\delta_{\text{ref}}$  represents the chemical shift of the reference compound in deuterated DMSO:  $\delta_{\text{TMS}} = 0$  ppm;  $\delta_{\text{benzene}} = 128.27$  ppm. An HP Compaq with a 2.39 GHz processor and 2 GB RAM was used for the calculations.

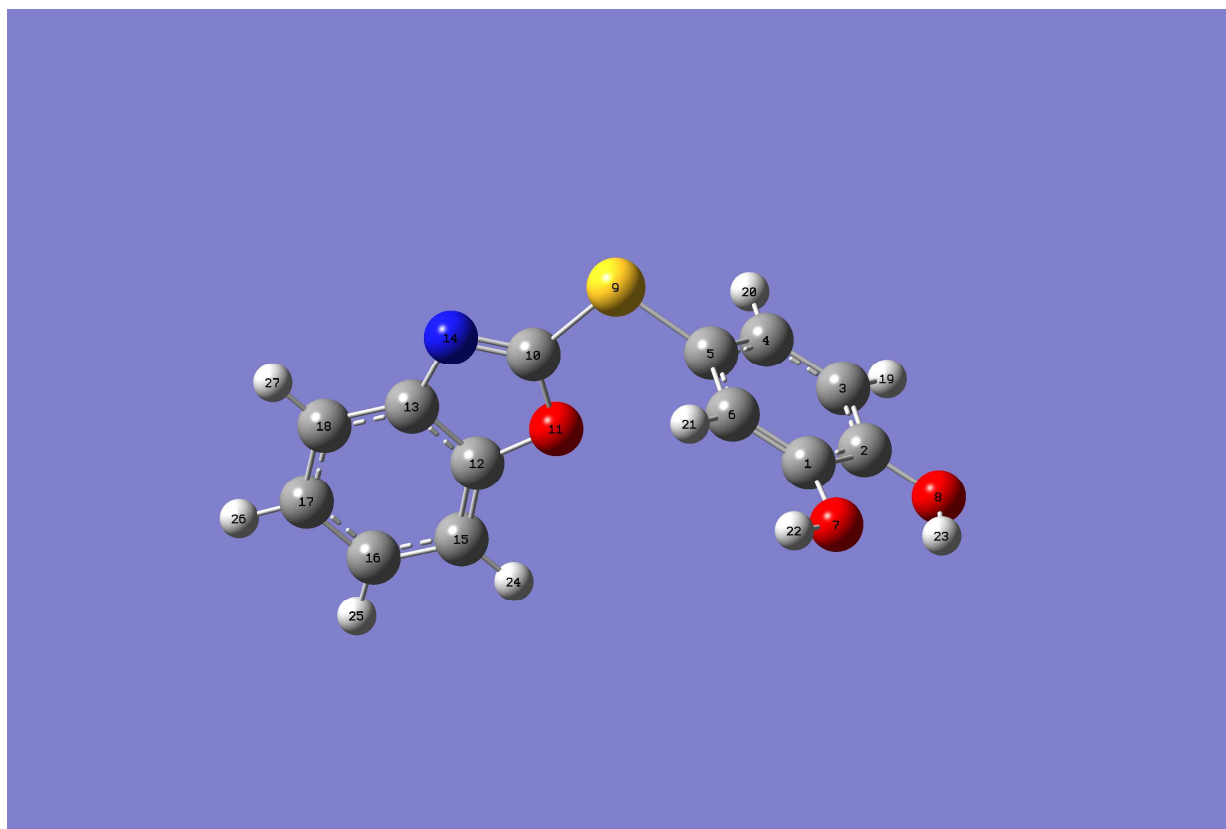

**Fig. 17** 3D structure of **3a**

#### 4.1. Cartesian of 3a

| Symbol | X          | Y          | Z          |
|--------|------------|------------|------------|
| C      | 3.1477780  | -0.4840430 | 0.8295260  |
| C      | 3.7115840  | -0.7013480 | -0.4388140 |
| C      | 3.1897990  | -0.0396640 | -1.5419860 |
| C      | 2.1125270  | 0.8291420  | -1.3922370 |
| C      | 1.5546830  | 1.0388110  | -0.1340220 |
| C      | 2.0830170  | 0.3849680  | 0.9855140  |
| O      | 3.7429190  | -1.1818460 | 1.8430090  |
| O      | 4.7555080  | -1.5451120 | -0.5803500 |
| S      | 0.2325240  | 2.2118320  | 0.0726940  |
| C      | -1.1829770 | 1.1810650  | 0.0722950  |
| O      | -1.0498810 | -0.1314110 | -0.2668520 |
| C      | -2.3317350 | -0.6126240 | -0.1923470 |
| C      | -3.1565960 | 0.4496740  | 0.1852060  |

|   |            |            |            |
|---|------------|------------|------------|
| N | -2.3753490 | 1.5881030  | 0.3514700  |
| C | -2.7811200 | -1.8964340 | -0.4331550 |
| C | -4.1528990 | -2.0909980 | -0.2788750 |
| C | -5.0047980 | -1.0434210 | 0.0984610  |
| C | -4.5253010 | 0.2406870  | 0.3371720  |
| H | 3.6378600  | -0.2170330 | -2.5129140 |
| H | 1.7044430  | 1.3423680  | -2.2549740 |
| H | 1.6560410  | 0.5595050  | 1.9687240  |
| H | 3.2976850  | -0.9959560 | 2.6786990  |
| H | 4.9673860  | -1.8999870 | 0.2965670  |
| H | -2.1112100 | -2.6961140 | -0.7256430 |
| H | -4.5695060 | -3.0767610 | -0.4563580 |
| H | -6.0660090 | -1.2420720 | 0.2062490  |
| H | -5.1817780 | 1.0520870  | 0.6293810  |

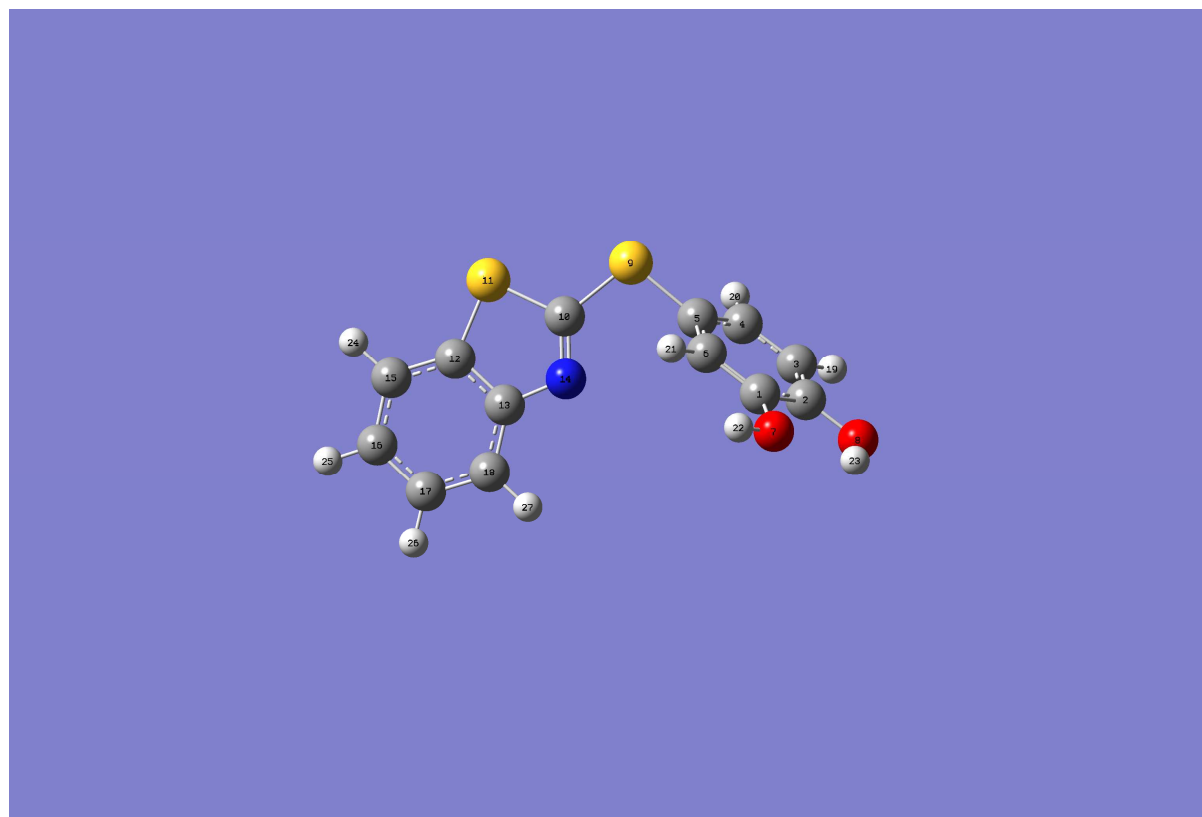

**Fig. 18** 3D structure of **3b**

#### 4.2. Cartesian of **3b**



| Symbol | X          | Y          | Z          |
|--------|------------|------------|------------|
| C      | -3.3044020 | 0.6986710  | 0.7179180  |
| C      | -3.9989020 | 0.6038130  | -0.4996440 |
| C      | -3.5753440 | -0.3043180 | -1.4598500 |
| C      | -2.4660530 | -1.1104230 | -1.2186480 |
| C      | -1.7847920 | -1.0143530 | -0.0085760 |
| C      | -2.2126120 | -0.1108720 | 0.9703280  |
| O      | -3.8094270 | 1.6232650  | 1.5900760  |
| O      | -5.0708460 | 1.3919960  | -0.7303230 |
| S      | -0.4262420 | -2.1097620 | 0.3206890  |
| C      | 0.9619470  | -1.0407230 | 0.1412380  |
| S      | 2.5669660  | -1.7853290 | 0.2125980  |
| C      | 3.2525780  | -0.1941630 | 0.0079470  |
| C      | 2.2090290  | 0.7492550  | -0.1030000 |
| N      | 0.9284430  | 0.2360160  | -0.0180700 |
| C      | 4.5901870  | 0.1859100  | -0.0532420 |
| C      | 4.8779310  | 1.5336260  | -0.2293890 |
| C      | 3.8523580  | 2.4806910  | -0.3422380 |
| C      | 2.5205900  | 2.1001980  | -0.2809250 |
| H      | -4.1201130 | -0.3633400 | -2.3950630 |
| H      | -2.1296160 | -1.8117070 | -1.9731540 |
| H      | -1.6807220 | -0.0393470 | 1.9138900  |
| H      | -3.2426750 | 1.6842680  | 2.3686100  |
| H      | -5.1910660 | 1.9565140  | 0.0485330  |
| H      | 5.3863190  | -0.5454140 | 0.0321680  |
| H      | 5.9132820  | 1.8537990  | -0.2811200 |
| H      | 4.1046820  | 3.5267900  | -0.4807770 |
| H      | 1.7163040  | 2.8218210  | -0.3687010 |

**5. Calculation of the E-factor, atom economy, TON and TOF of the laccase-catalyzed domino reaction between catechol (1a) and 2-mercaptobenzoxazole (2a)**

Yield of **3a** = 93%

**5.1. Calculation of the E-factor<sup>6</sup>**

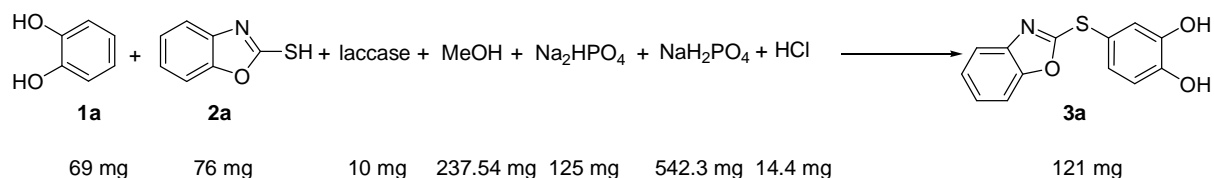

Total amount of the reactants (taking into account a loss of 10% of the solvent used) = 69 mg + 76 mg + 10 mg + 237.54 mg + 125 mg + 542.3 mg + 14.4 mg = 1074.24 mg.

Amount of the final product = 121 mg.

Amount of waste = 1074.24 - 121 = 953.24 mg

E-factor = Amount of waste [kg]/Amount of product [kg] = 953.24/121 = **7.88 kg kg<sup>-1</sup>**.

## 5.2. Calculation of the atom economy<sup>7</sup>

The atom economy of the reaction was calculated according to the following equation:

$$\% \text{ Atom economy} = 100 \times \frac{\text{Molecular weight of the desired product}}{\text{Molecular weight of all reactants}}.$$

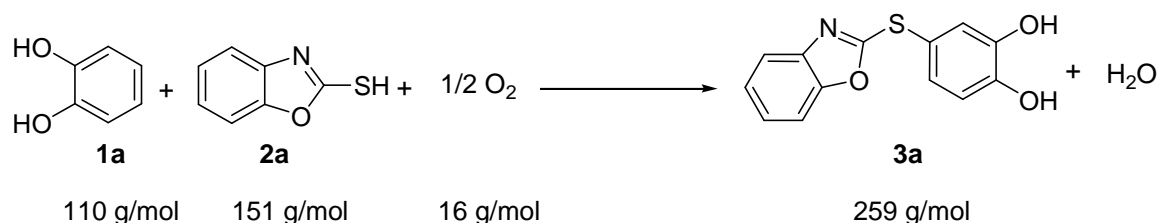

Atom economy =  $100 \times 259/277 = 94\%$

## 5.3. Calculation of TON

Molecular weight of laccase from *A. bisporus* = 96 000 g/mol.<sup>8</sup>

Specific activity of the laccase = 6 U/mg.

60 U Laccase corresponds to 10 mg, ie  $1.0417 \times 10^{-7}$  mol =  $1.0417 \times 10^{-4}$  mmol.

TON = Amount of the substrate consumed [mmol] / Amount of catalyst [mmol].

TON = 0.47 [mmol] /  $1.0417 \times 10^{-4}$  [mmol] = **4512**.

## 5.4. Calculation of TOF

$$\text{TOF} = \frac{\text{TON}}{\text{Time}}.$$

TOF = 4512 / 16 h = **282 h<sup>-1</sup>**.

## 6. References

- 1 D. Nematollahi and E. Tammari, *J. Org. Chem.*, 2005, **70**, 7769.
- 2 A. R. Fakhari, S. S. H. Davarani, H. Ahmar and S. Makarem, *J. Appl. Electrochem.*, 2008, **38**, 1743.
- 3 M. J. Frisch, G. W. Trucks, H. B. Schlegel, G. E. Scuseria, M. A. Robb, J. R. Cheeseman, J. A. Montgomery, Jr., T. Vreven, K. N. Kudin, J. C. Burant, J. M. Millam, S. S. Iyengar, J. Tomasi, V. Barone, B. Mennucci, M. Cossi, G. Scalmani, N. Rega, G. A. Petersson, H. Nakatsuji, M. Hada, M. Ehara, K. Toyota, R. Fukuda, J. Hasegawa, M. Ishida, T. Nakajima, Y. Honda, O. Kitao, H. Nakai, M. Klene, X. Li, J. E. Knox, H. P. Hratchian, J. B. Cross, V. Bakken, C. Adamo, J. Jaramillo, R. Gomperts, R. E. Stratmann, O. Yazyev, A. J. Austin, R. Cammi, C. Pomelli, J. W. Ochterski, P. Y. Ayala, K. Morokuma, G. A. Voth, P. Salvador, J. J. Dannenberg, V. G. Zakrzewski, S. Dapprich, A. D. Daniels, M. C. Strain, O. Farkas, D. K. Malick, A. D. Rabuck, K. Raghavachari, J. B. Foresman, J. V. Ortiz, Q. Cui, A. G. Baboul, S. Clifford, J. Cioslowski, B. B. Stefanov, G. Liu, A. Liashenko, P. Piskorz, I. Komaromi, R. L. Martin, D. J. Fox, T. Keith, M. A. Al-Laham, C. Y. Peng, A. Nanayakkara, M. Challacombe, P. M. W. Gill, B. G. Johnson, W. Chen, M. W. Wong, C. Gonzalez and J. A. Pople, *GAUSSIAN 03 (Revision E.01)*, Gaussian, Inc., Wallingford, CT, 2004.
- 4 *Chem3D Pro, version 12*, Cambridge Soft, Cambridge, MA, USA, 2009.
- 5 A. M. Sarotti and S. C. Pellegrinet, *J. Org. Chem.*, 2009, **74**, 7254.
- 6 (a) R. A. Sheldon, *Green Chem.*, 2007, **9**, 1273; (b) R. A. Sheldon, *Chemtech.*, 1994, **24**, 38; (c) R. A. Sheldon, *Chem. Ind.*, 1997, 12.
- 7 B. M. Trost, *Angew. Chem., Int. Ed.*, 1995, **34**, 259.
- 8 P. Baldrian, *FEMS Microbiol. Rev.*, 2006, **30**, 215.
